# Supplementary material for: Investigating Causal Associations of Diet-Derived Circulating Antioxidants with the Risk of Digestive System Cancers: A Mendelian Randomization Study
Source: MDPI journal article supplement (doi:10.3390/nu14153237), 2022-08-08
Supplement: s1 [file s1]

### Supplementary Tables

|                                                                                                                                                                                          |    |
|------------------------------------------------------------------------------------------------------------------------------------------------------------------------------------------|----|
| Table S1 The summary information of the studies used for genetic instrumental variables extraction of absolute circulating antioxidants.....                                             | 2  |
| Table S2 The diagnostic information of five digestive system cancers in UK Biobank and FinnGen.....                                                                                      | 3  |
| Table S3 The causal effect estimates of the associations between genetic instrumental variables for absolute circulating antioxidants and risk of five digestive system cancers.....     | 4  |
| Table S4 The causal effect estimates of the associations between genetic instrumental variables for circulating antioxidant metabolites and risk of five digestive system cancers.....   | 8  |
| Table S5 The complementary MR analyses results of the causal effects of absolute circulating antioxidants on five digestive system cancers.....                                          | 15 |
| Table S6 The complementary MR analyses results of the causal effects of circulating antioxidant metabolites on five digestive system cancers.....                                        | 19 |
| Table S7 For the outcomes from other GWAS studies, the sensitivity MR analyses results of the causal effects of absolute ascorbate and retinol level on colon and pancreatic cancer..... | 23 |

**Table S1 The summary information of the studies used for genetic instrumental variables extraction of absolute circulating antioxidants.**

| Absolute circulating antioxidants                                     | Sample size | Age             | Sex (male) | Antioxidant concentration |
|-----------------------------------------------------------------------|-------------|-----------------|------------|---------------------------|
| <b><math>\alpha</math>-Tocopherol (mg/L) <sup>1</sup></b>             |             |                 |            |                           |
| ATBC                                                                  | 4,014       | 58.1 $\pm$ 5.0  | 100%       | 11.9 $\pm$ 3.4            |
| <b>Ascorbate (<math>\mu</math>mol/L) <sup>2</sup></b>                 |             |                 |            |                           |
| Fenland GWAS                                                          | 1,349       | 45 $\pm$ 7      | 44%        | 66.2 $\pm$ 21.3           |
| Fenland UKBB                                                          | 8,391       | 49 $\pm$ 7      | 47%        | 68.6 $\pm$ 21.5           |
| Fenland Core Exome                                                    | 1,031       | 51 $\pm$ 7      | 45%        | 68.3 $\pm$ 21.8           |
| InterAct subcohort GWAS                                               | 3,521       | 51 $\pm$ 9      | 35%        | 42.8 $\pm$ 19             |
| InterAct subcohort core-exome                                         | 6,504       | 53 $\pm$ 9      | 38%        | 42.9 $\pm$ 19.1           |
| InterAct non-subcohort GWAS                                           | 2,944       | 55 $\pm$ 8      | 48%        | 36.4 $\pm$ 17.6           |
| InterAct non-subcohort core-exome                                     | 3,872       | 56 $\pm$ 7      | 52%        | 36.5 $\pm$ 18.9           |
| EPIC-Norfolk GWAS                                                     | 16,756      | 59 $\pm$ 9      | 47%        | 53.8 $\pm$ 20.2           |
| EPIC-CVD subcohort                                                    | 885         | 53 $\pm$ 12     | 41%        | 41.0 $\pm$ 21.0           |
| EPIC-CVD non-subcohort                                                | 6,765       | 57 $\pm$ 8      | 55%        | 37.9 $\pm$ 20.8           |
| <b>Retinol (<math>\mu</math>g/dL) <sup>3</sup></b>                    |             |                 |            |                           |
| ATBC                                                                  | 4,014       | 58.1 $\pm$ 5.0  | 100%       | 572 (796-654)             |
| PLCO                                                                  | 992         | 64.6 $\pm$ 4.9  | 100%       | 672 (562-794)             |
| <b><math>\beta</math>-Carotene (<math>\mu</math>g/L) <sup>4</sup></b> |             |                 |            |                           |
| NHS                                                                   | 2,344       | 58.8 $\pm$ 6.4  | 0%         | 303 $\pm$ 258             |
| <b>Lycopene (<math>\mu</math>g/dL) <sup>5</sup></b>                   |             |                 |            |                           |
| HAPI                                                                  | 441         | 43.1 $\pm$ 13.0 | 58%        | 39.2 $\pm$ 19.9           |
| <b>Urate (<math>\mu</math>mol/L) <sup>6</sup></b>                     |             |                 |            |                           |
| GUGC                                                                  | 110,347     | 37.7-76.4       | 0-75.6%    | 3.86-6.1                  |

ATBC: Beta-Carotene Cancer Prevention Study; EPIC-Norfolk: the Norfolk arm of the European Prospective Investigation on Cancer study; EPIC: European Prospective Investigation into Cancer and Nutrition; PLCO: Prostate, Lung, Colorectal, and Ovarian Cancer Screening Trial; NHS: the Nurses' Health Study; HAPI: Heredity and Phenotype Intervention Heart Study; GUGC: the Global Urate Genetics Consortium

**Table S2 The diagnostic information of five digestive system cancers in UK Biobank and FinnGen.**

| Outcome                                  | UK Biobank |             |       |          | FinnGen |       |        |             |       |          |
|------------------------------------------|------------|-------------|-------|----------|---------|-------|--------|-------------|-------|----------|
|                                          | ICD-10     | Sample Size | Cases | Controls | ICD-O-3 |       |        | Sample Size | Cases | Controls |
|                                          |            |             |       |          | ICD-8   | ICD-9 | ICD-10 |             |       |          |
| Esophagus cancer                         | C15        | 420,531     | 975   | 419,556  | 150     | 150   | C15    | 174,238     | 232   | 174,006  |
| Stomach cancer                           | C16        | 420,531     | 764   | 419,767  | 151     | 151   | C16    | 174,639     | 633   | 174,006  |
| Colon cancer                             | C18        | 420,531     | 3,759 | 416,772  | 153     | 153   | C18    | 175,809     | 1,803 | 174,006  |
| Pancreas cancer                          | C25        | 420,531     | 933   | 419,598  | 157     | 157   | C25    | 174,611     | 605   | 174,006  |
| Liver and intrahepatic bile ducts cancer | C22        | 420,531     | 539   | 419,992  | 155     | 155   | C22    | 174,310     | 304   | 174,006  |

**Table S3 The causal effect estimates of the associations between genetic instrumental variables for absolute circulating antioxidants and risk of five digestive system cancers.**

| Trait                | SNP         | Gene                       | Effect allele | F-statistic* | Outcome  |       |                   |       |                |       |              |       |                   |       |              |       |
|----------------------|-------------|----------------------------|---------------|--------------|----------|-------|-------------------|-------|----------------|-------|--------------|-------|-------------------|-------|--------------|-------|
|                      |             |                            |               |              | Exposure |       | Esophageal cancer |       | Stomach cancer |       | Colon cancer |       | Pancreatic cancer |       | Liver cancer |       |
|                      |             |                            |               |              | Beta     | SE    | Beta              | SE    | Beta           | SE    | Beta         | SE    | Beta              | SE    | Beta         | SE    |
| UK Biobank           |             |                            |               |              |          |       |                   |       |                |       |              |       |                   |       |              |       |
| $\alpha$ -tocopherol | rs11057830  | SCARB1                     | A             | 16.00        | 0.040    | 0.010 | -0.069            | 0.089 | 0.0002         | 0.075 | 0.002        | 0.034 | 0.102             | 0.067 | 0.045        | 0.089 |
| $\alpha$ -tocopherol | rs2108622   | CYP4F2                     | T             | 16.00        | 0.040    | 0.010 | 0.092             | 0.050 | 0.064          | 0.056 | -0.021       | 0.026 | 0.088             | 0.051 | 0.026        | 0.066 |
| $\alpha$ -tocopherol | rs964184    | BUD13/<br>ZNF259/<br>APOA5 | G             | 16.00        | 0.040    | 0.010 | 0.064             | 0.067 | -0.015         | 0.076 | 0.035        | 0.035 | -0.068            | 0.069 | -0.133       | 0.090 |
| Ascorbate            | rs10051765  | RGS14                      | C             | 31.04        | 0.039    | 0.007 | -0.025            | 0.049 | -0.072         | 0.055 | 0.032        | 0.025 | 0.026             | 0.049 | -0.025       | 0.065 |
| Ascorbate            | rs10136000  | AKT1                       | A             | 32.65        | 0.040    | 0.007 | 0.047             | 0.051 | 0.042          | 0.057 | -0.046       | 0.026 | -0.019            | 0.052 | 0.136        | 0.068 |
| Ascorbate            | rs117885456 | SNRPF                      | A             | 42.25        | 0.078    | 0.012 | -0.061            | 0.081 | -0.067         | 0.091 | -0.018       | 0.042 | 0.078             | 0.082 | 0.048        | 0.108 |
| Ascorbate            | rs13028225  | SLC23A3                    | T             | 128.4        | 0.102    | 0.009 | -0.089            | 0.066 | -0.014         | 0.074 | 0.025        | 0.034 | -0.015            | 0.067 | 0.035        | 0.088 |
| Ascorbate            | rs174547    | FADS1                      | C             | 26.45        | 0.036    | 0.007 | -0.076            | 0.048 | -0.048         | 0.054 | -0.039       | 0.025 | 0.117             | 0.049 | 0.017        | 0.064 |
| Ascorbate            | rs2559850   | CHPT1                      | A             | 93.44        | 0.058    | 0.006 | -0.089            | 0.047 | -0.133         | 0.053 | 0.021        | 0.024 | -0.061            | 0.048 | -0.019       | 0.063 |
| Ascorbate            | rs33972313  | SLC23A1                    | C             | 400.00       | 0.360    | 0.018 | 0.048             | 0.124 | -0.109         | 0.14  | -0.130       | 0.064 | 0.074             | 0.126 | 0.107        | 0.166 |
| Ascorbate            | rs56738967  | MAF                        | C             | 34.31        | 0.041    | 0.007 | -0.004            | 0.049 | -0.056         | 0.055 | -0.060       | 0.025 | -0.029            | 0.050 | 0.155        | 0.066 |
| Ascorbate            | rs6693447   | RER1                       | T             | 42.25        | 0.039    | 0.006 | -0.027            | 0.046 | 0.028          | 0.052 | -0.014       | 0.024 | 0.059             | 0.047 | -0.091       | 0.061 |
| Ascorbate            | rs9895661   | BCAS3                      | T             | 62.02        | 0.063    | 0.008 | 0.089             | 0.061 | -0.053         | 0.069 | -0.020       | 0.031 | -0.032            | 0.062 | -0.012       | 0.082 |
| Retinol              | rs10882272  | RBP4                       | C             | 56.25        | -0.030   | 0.004 | 0.081             | 0.047 | 0.131          | 0.053 | -0.025       | 0.024 | 0.113             | 0.048 | 0.041        | 0.063 |
| Retinol              | rs1667255   | TTR                        | C             | 56.25        | 0.030    | 0.004 | 0.075             | 0.047 | 0.084          | 0.053 | -0.029       | 0.024 | 0.032             | 0.048 | -0.033       | 0.063 |
| Carotene             | rs6564851   | BCMO1                      | G             | 98.67        | 0.149    | 0.015 | -0.013            | 0.046 | 0.037          | 0.055 | -0.006       | 0.024 | -0.028            | 0.047 | -0.011       | 0.061 |
| Carotene             | rs7501331   | BCMO1                      | T             | 17.69        | -0.067   | 0.016 | -0.013            | 0.054 | -0.054         | 0.057 | -0.001       | 0.028 | 0.072             | 0.055 | 0.034        | 0.072 |
| Lycopene             | rs2232315   | G6PC2                      | A             | 24.34        | 0.740    | 0.150 | -0.139            | 0.168 | -0.070         | 0.188 | 0.091        | 0.086 | -0.276            | 0.170 | 0.123        | 0.223 |
| Lycopene             | rs341075    | -                          | A             | 26.19        | -0.870   | 0.170 | 0.036             | 0.134 | 0.144          | 0.151 | 0.055        | 0.069 | 0.101             | 0.137 | 0.099        | 0.179 |
| Lycopene             | rs4635297   | BC039545                   | A             | 27.04        | 0.260    | 0.050 | -0.056            | 0.058 | -0.021         | 0.066 | 0.021        | 0.03  | -0.015            | 0.060 | -0.058       | 0.078 |
| Lycopene             | rs6108801   | -                          | C             | 28.44        | -0.480   | 0.090 | -0.021            | 0.123 | 0.107          | 0.138 | 0.045        | 0.063 | 0.131             | 0.125 | 0.127        | 0.165 |
| Lycopene             | rs7680948   | SETD7                      | A             | 40.11        | -0.190   | 0.030 | 0.001             | 0.051 | 0.043          | 0.058 | -0.08        | 0.026 | -0.058            | 0.052 | 0.031        | 0.069 |

|       |            |              |   |         |        |       |        |       |        |       |        |       |        |       |        |       |
|-------|------------|--------------|---|---------|--------|-------|--------|-------|--------|-------|--------|-------|--------|-------|--------|-------|
| Urate | rs10761587 | -            | C | 46.42   | -0.062 | 0.009 | 0.045  | 0.073 | -0.017 | 0.082 | 0.112  | 0.038 | -0.055 | 0.075 | -0.04  | 0.098 |
| Urate | rs11264341 | TRIM46       | T | 66.19   | -0.048 | 0.006 | 0.095  | 0.046 | 0.073  | 0.052 | 0.01   | 0.024 | -0.067 | 0.047 | -0.073 | 0.062 |
| Urate | rs1165151  | SLC17A1      | G | 290.26  | 0.092  | 0.005 | -0.034 | 0.046 | -0.012 | 0.052 | -0.028 | 0.024 | 0.083  | 0.047 | 0.056  | 0.061 |
| Urate | rs1171614  | SLC16A9      | C | 108.63  | 0.074  | 0.007 | -0.152 | 0.054 | -0.028 | 0.061 | -0.038 | 0.028 | -0.012 | 0.055 | -0.069 | 0.073 |
| Urate | rs11722228 | SLC2A9       | T | 1406.25 | 0.210  | 0.006 | 0.036  | 0.048 | -0.011 | 0.054 | 0.025  | 0.025 | 0.046  | 0.049 | 0.029  | 0.064 |
| Urate | rs1178977  | BAZ1B        | G | 52.51   | -0.050 | 0.007 | 0.062  | 0.057 | -0.002 | 0.064 | -0.006 | 0.029 | 0.007  | 0.058 | -0.027 | 0.077 |
| Urate | rs1260326  | GCKR         | C | 196.00  | -0.077 | 0.006 | 0.006  | 0.047 | 0.06   | 0.053 | 0.019  | 0.024 | 0.065  | 0.048 | 0.007  | 0.062 |
| Urate | rs1394125  | UBE2Q2       | A | 46.59   | 0.043  | 0.006 | -0.044 | 0.048 | -0.042 | 0.053 | -0.002 | 0.024 | 5E-05  | 0.048 | 0.039  | 0.064 |
| Urate | rs1471633  | -            | C | 127.61  | -0.061 | 0.005 | 0.017  | 0.046 | -0.033 | 0.051 | 0.010  | 0.024 | 0.054  | 0.047 | -0.110 | 0.061 |
| Urate | rs17050272 | LOC105373585 | A | 36.79   | 0.037  | 0.006 | 0.038  | 0.046 | 0.028  | 0.052 | -0.014 | 0.024 | -0.094 | 0.047 | -0.075 | 0.062 |
| Urate | rs17632159 | LOC105379030 | C | 38.81   | -0.038 | 0.006 | -0.008 | 0.050 | -0.028 | 0.056 | -0.017 | 0.026 | -0.032 | 0.051 | -0.012 | 0.066 |
| Urate | rs1825043  | -            | A | 59.17   | 0.100  | 0.013 | 0.142  | 0.103 | 0.014  | 0.115 | 0.110  | 0.053 | 0.022  | 0.105 | -0.144 | 0.137 |
| Urate | rs2078267  | SLC22A11     | T | 174.78  | -0.078 | 0.006 | 0.016  | 0.046 | 0.067  | 0.052 | -0.004 | 0.024 | -0.003 | 0.047 | -0.052 | 0.061 |
| Urate | rs2231142  | ABCG2        | T | 584.47  | 0.220  | 0.009 | 0.078  | 0.072 | 0.150  | 0.081 | 0.015  | 0.037 | 0.009  | 0.073 | 0.115  | 0.096 |
| Urate | rs2307394  | ORC4         | C | 37.70   | 0.035  | 0.006 | -0.021 | 0.050 | 0.037  | 0.056 | 0.024  | 0.026 | -0.007 | 0.051 | -0.016 | 0.067 |
| Urate | rs2941484  | HNF4G        | T | 79.37   | 0.049  | 0.006 | 0.036  | 0.046 | 0.010  | 0.052 | -0.03  | 0.024 | 0.031  | 0.047 | -0.083 | 0.062 |
| Urate | rs3741414  | INHBC        | T | 102.88  | -0.071 | 0.007 | 0.096  | 0.053 | 0.104  | 0.060 | 0.054  | 0.027 | 0.047  | 0.054 | 0.024  | 0.071 |
| Urate | rs642803   | OVOL1        | T | 63.41   | -0.043 | 0.005 | 0.008  | 0.046 | 0.030  | 0.052 | 0.035  | 0.024 | -0.022 | 0.047 | -0.029 | 0.061 |
| Urate | rs653178   | ATXN2        | T | 44.44   | -0.036 | 0.005 | -0.020 | 0.046 | 0.009  | 0.051 | 0.076  | 0.023 | -0.039 | 0.046 | 0.134  | 0.061 |
| Urate | rs6598541  | IGF1R        | G | 59.59   | -0.044 | 0.006 | 0.012  | 0.048 | -0.027 | 0.054 | -0.011 | 0.025 | -0.092 | 0.049 | 0.058  | 0.064 |
| Urate | rs675209   | -            | C | 103.25  | -0.063 | 0.006 | 0.052  | 0.052 | -0.008 | 0.058 | -0.02  | 0.026 | -0.053 | 0.052 | 0.013  | 0.069 |
| Urate | rs6770152  | -            | T | 73.47   | -0.048 | 0.006 | 0.013  | 0.046 | 0.027  | 0.052 | 0.098  | 0.024 | 0.021  | 0.047 | 0.078  | 0.062 |
| Urate | rs6830367  | CLNK         | C | 50.17   | 0.051  | 0.007 | 0.014  | 0.060 | 0.009  | 0.068 | 0.02   | 0.031 | -0.060 | 0.062 | 0.032  | 0.081 |
| Urate | rs7193778  | -            | T | 35.39   | -0.047 | 0.008 | -0.094 | 0.064 | -0.111 | 0.072 | -0.022 | 0.033 | -0.088 | 0.065 | -0.060 | 0.085 |
| Urate | rs7224610  | HLF          | A | 47.74   | -0.038 | 0.006 | -0.043 | 0.047 | -0.050 | 0.053 | 0.015  | 0.024 | -0.054 | 0.048 | 0.006  | 0.063 |
| Urate | rs729761   | POLR1C       | G | 53.31   | 0.046  | 0.006 | -0.013 | 0.051 | -0.015 | 0.057 | 0.034  | 0.026 | -0.038 | 0.052 | 0.120  | 0.068 |
| Urate | rs7654258  | LOC107986260 | T | 98.01   | -0.099 | 0.010 | -0.060 | 0.088 | -0.100 | 0.100 | -0.016 | 0.046 | 0.157  | 0.090 | -0.067 | 0.118 |

#### FinnGen

|                      |            |        |   |       |       |       |        |       |       |       |        |       |        |       |        |       |
|----------------------|------------|--------|---|-------|-------|-------|--------|-------|-------|-------|--------|-------|--------|-------|--------|-------|
| $\alpha$ -Tocopherol | rs11057830 | SCARB1 | A | 16.00 | 0.040 | 0.010 | -0.082 | 0.137 | 0.090 | 0.284 | -0.006 | 0.050 | -0.049 | 0.085 | 0.042  | 0.119 |
| $\alpha$ -Tocopherol | rs2108622  | CYP4F2 | T | 16.00 | 0.040 | 0.010 | 0.033  | 0.117 | 0.041 | 0.071 | -0.047 | 0.043 | -0.004 | 0.073 | 0.104  | 0.102 |
| $\alpha$ -Tocopherol | rs964184   | BUD13/ | G | 16.00 | 0.040 | 0.010 | 0.081  | 0.132 | 0.127 | 0.080 | -0.009 | 0.048 | -0.025 | 0.082 | -0.031 | 0.114 |

|           |             | ZNF259/<br>APOA5 |   |         |        |       |        |       |        |       |        |       |        |       |        |       |
|-----------|-------------|------------------|---|---------|--------|-------|--------|-------|--------|-------|--------|-------|--------|-------|--------|-------|
| Ascorbate | rs10051765  | RGS14            | C | 31.04   | 0.039  | 0.007 | -0.074 | 0.096 | 0.114  | 0.058 | -0.014 | 0.035 | -0.042 | 0.060 | -0.133 | 0.083 |
| Ascorbate | rs10136000  | AKT1             | A | 32.65   | 0.040  | 0.007 | -0.007 | 0.103 | 0.162  | 0.063 | -0.049 | 0.038 | 0.027  | 0.065 | -0.147 | 0.09  |
| Ascorbate | rs117885456 | SNRPF            | A | 42.25   | 0.078  | 0.012 | -0.221 | 0.169 | -0.043 | 0.103 | -0.078 | 0.061 | -0.238 | 0.106 | -0.145 | 0.148 |
| Ascorbate | rs13028225  | SLC23A3          | T | 128.4   | 0.102  | 0.009 | 0.137  | 0.130 | 0.020  | 0.100 | 0.037  | 0.047 | 0.024  | 0.081 | -0.194 | 0.113 |
| Ascorbate | rs174547    | FADS1            | C | 26.45   | 0.036  | 0.007 | 0.103  | 0.095 | 0.074  | 0.058 | -0.025 | 0.035 | 0.046  | 0.059 | 0.085  | 0.082 |
| Ascorbate | rs2559850   | CHPT1            | A | 93.44   | 0.058  | 0.006 | 0.012  | 0.095 | -0.063 | 0.058 | -0.016 | 0.035 | 0.038  | 0.059 | -0.150 | 0.083 |
| Ascorbate | rs33972313  | SLC23A1          | C | 400.00  | 0.360  | 0.018 | 0.298  | 0.326 | 0.159  | 0.197 | -0.158 | 0.118 | -0.065 | 0.203 | -0.163 | 0.283 |
| Ascorbate | rs56738967  | MAF              | C | 34.31   | 0.041  | 0.007 | -0.042 | 0.101 | 0.017  | 0.062 | -0.015 | 0.037 | -0.043 | 0.063 | -0.121 | 0.088 |
| Ascorbate | rs6693447   | RER1             | T | 42.25   | 0.039  | 0.006 | 0.107  | 0.094 | 0.011  | 0.057 | 0.026  | 0.034 | 0.022  | 0.059 | 0.119  | 0.082 |
| Ascorbate | rs9895661   | BCAS3            | T | 62.02   | 0.063  | 0.008 | 0.050  | 0.120 | 0.074  | 0.073 | -0.036 | 0.044 | 0.015  | 0.075 | 0.020  | 0.104 |
| Retinol   | rs10882272  | RBP4             | C | 56.25   | -0.030 | 0.004 | 0.056  | 0.098 | 0.029  | 0.059 | -0.026 | 0.036 | 0.116  | 0.061 | 0.030  | 0.085 |
| Retinol   | rs1667255   | TTR              | C | 56.25   | 0.030  | 0.004 | -0.148 | 0.155 | -0.059 | 0.062 | 0.036  | 0.037 | -0.093 | 0.064 | -0.008 | 0.089 |
| Carotene  | rs6564851   | BCMO1            | G | 98.67   | 0.149  | 0.015 | -0.04  | 0.097 | 0.087  | 0.059 | -0.058 | 0.035 | 0.074  | 0.06  | 0.136  | 0.084 |
| Carotene  | rs7501331   | BCMO1            | T | 17.69   | -0.067 | 0.016 | 0.252  | 0.101 | 0.064  | 0.061 | 0.043  | 0.037 | -0.017 | 0.063 | 0.032  | 0.088 |
| Lycopene  | rs2232315   | G6PC2            | A | 24.34   | 0.740  | 0.150 | 0.274  | 0.646 | 0.287  | 0.393 | -0.347 | 0.235 | 0.006  | 0.421 | 0.595  | 0.577 |
| Lycopene  | rs341075    | -                | A | 26.19   | -0.870 | 0.170 | -0.138 | 0.250 | -0.002 | 0.150 | 0.061  | 0.09  | 0.364  | 0.155 | -0.031 | 0.214 |
| Lycopene  | rs4635297   | BC039545         | A | 27.04   | 0.260  | 0.050 | -0.001 | 0.122 | -0.179 | 0.074 | -0.008 | 0.044 | 0.027  | 0.076 | -0.195 | 0.107 |
| Lycopene  | rs6108801   | -                | C | 28.44   | -0.480 | 0.090 | 0.531  | 0.408 | 0.485  | 0.245 | 0.093  | 0.148 | -0.182 | 0.254 | 0.358  | 0.363 |
| Lycopene  | rs7680948   | SETD7            | A | 40.11   | -0.190 | 0.030 | 0.064  | 0.109 | -0.046 | 0.066 | 0.019  | 0.04  | 0.047  | 0.068 | -0.068 | 0.096 |
| Urate     | rs10761587  | -                | C | 46.42   | -0.062 | 0.009 | -0.107 | 0.134 | -0.026 | 0.081 | 0.051  | 0.049 | -0.108 | 0.083 | -0.133 | 0.115 |
| Urate     | rs11264341  | TRIM46           | T | 66.19   | -0.048 | 0.006 | -0.038 | 0.094 | 0.143  | 0.057 | -0.054 | 0.034 | 0.003  | 0.058 | -0.077 | 0.081 |
| Urate     | rs1165151   | SLC17A1          | G | 290.26  | 0.092  | 0.005 | -0.081 | 0.096 | -0.048 | 0.058 | 0.006  | 0.035 | -0.047 | 0.06  | 0.070  | 0.084 |
| Urate     | rs1171614   | SLC16A9          | C | 108.63  | 0.074  | 0.007 | -0.001 | 0.129 | 0.037  | 0.078 | -0.038 | 0.047 | -0.008 | 0.08  | 0.225  | 0.112 |
| Urate     | rs11722228  | SLC2A9           | T | 1406.25 | 0.210  | 0.006 | -0.290 | 0.100 | -0.030 | 0.060 | -0.056 | 0.036 | 0.069  | 0.062 | 0.016  | 0.087 |
| Urate     | rs1178977   | BAZ1B            | G | 52.51   | -0.050 | 0.007 | 0.142  | 0.122 | 0.078  | 0.074 | -0.009 | 0.045 | 0.004  | 0.077 | -0.114 | 0.107 |
| Urate     | rs1260326   | GCKR             | C | 196.00  | -0.077 | 0.006 | 0.016  | 0.098 | -0.005 | 0.060 | 0.105  | 0.036 | 0.018  | 0.061 | 0.022  | 0.085 |
| Urate     | rs1394125   | UBE2Q2           | A | 46.59   | 0.043  | 0.006 | -0.15  | 0.107 | 0.083  | 0.065 | 0.019  | 0.039 | 0.005  | 0.066 | -0.035 | 0.093 |
| Urate     | rs1471633   | -                | C | 127.61  | -0.061 | 0.005 | 0.072  | 0.098 | 0.002  | 0.059 | 0.019  | 0.036 | -0.065 | 0.061 | 0.125  | 0.086 |
| Urate     | rs17050272  | LOC105373585     | A | 36.79   | 0.037  | 0.006 | 0.076  | 0.094 | 0.019  | 0.057 | -0.041 | 0.034 | 0.059  | 0.059 | 0.104  | 0.082 |

|       |            |              |   |        |        |       |        |       |        |       |        |       |        |       |        |       |
|-------|------------|--------------|---|--------|--------|-------|--------|-------|--------|-------|--------|-------|--------|-------|--------|-------|
| Urate | rs17632159 | LOC105379030 | C | 38.81  | -0.038 | 0.006 | 0.012  | 0.108 | -0.036 | 0.065 | -0.006 | 0.039 | 0.007  | 0.067 | 0.034  | 0.094 |
| Urate | rs1825043  | -            | A | 59.17  | 0.100  | 0.013 | -0.349 | 0.176 | 0.062  | 0.107 | 0.037  | 0.065 | 0.083  | 0.109 | 0.065  | 0.153 |
| Urate | rs2078267  | SLC22A11     | T | 174.78 | -0.078 | 0.006 | -0.037 | 0.095 | -0.043 | 0.057 | 0.030  | 0.035 | -0.003 | 0.059 | 0.055  | 0.083 |
| Urate | rs2231142  | ABCG2        | T | 584.47 | 0.220  | 0.009 | -0.205 | 0.176 | -0.02  | 0.107 | -0.043 | 0.064 | 0.214  | 0.110 | 0.387  | 0.155 |
| Urate | rs2307394  | ORC4         | C | 37.70  | 0.035  | 0.006 | -0.022 | 0.099 | -0.035 | 0.060 | -0.054 | 0.036 | 0.039  | 0.062 | -0.117 | 0.086 |
| Urate | rs2941484  | HNF4G        | T | 79.37  | 0.049  | 0.006 | -0.065 | 0.094 | 0.025  | 0.057 | 0.016  | 0.034 | -0.002 | 0.058 | -0.061 | 0.082 |
| Urate | rs3741414  | INHBC        | T | 102.88 | -0.071 | 0.007 | -0.100 | 0.110 | 0.070  | 0.067 | 0.039  | 0.040 | 0.027  | 0.069 | -0.008 | 0.096 |
| Urate | rs642803   | OVOL1        | T | 63.41  | -0.043 | 0.005 | -0.078 | 0.096 | -0.014 | 0.058 | 0.010  | 0.035 | 0.025  | 0.06  | -0.076 | 0.084 |
| Urate | rs653178   | ATXN2        | T | 44.44  | -0.036 | 0.005 | 0.092  | 0.095 | -0.023 | 0.058 | 0.029  | 0.035 | 0.052  | 0.059 | 0.007  | 0.083 |
| Urate | rs6598541  | IGF1R        | G | 59.59  | -0.044 | 0.006 | 0.010  | 0.098 | -0.110 | 0.060 | -0.023 | 0.036 | -0.042 | 0.061 | 0.038  | 0.085 |
| Urate | rs675209   | -            | C | 103.25 | -0.063 | 0.006 | -0.097 | 0.101 | -0.104 | 0.061 | -0.013 | 0.037 | -0.063 | 0.062 | -0.005 | 0.087 |
| Urate | rs6770152  | -            | T | 73.47  | -0.048 | 0.006 | 0.038  | 0.096 | -0.011 | 0.058 | 0.009  | 0.035 | 0.040  | 0.060 | -0.121 | 0.084 |
| Urate | rs6830367  | CLNK         | C | 50.17  | 0.051  | 0.007 | 0.161  | 0.117 | -0.027 | 0.071 | 0.012  | 0.043 | -0.111 | 0.073 | 0.114  | 0.102 |
| Urate | rs7193778  | -            | T | 35.39  | -0.047 | 0.008 | -0.144 | 0.136 | -0.042 | 0.083 | -0.125 | 0.05  | -0.048 | 0.085 | 0.283  | 0.119 |
| Urate | rs7224610  | HLF          | A | 47.74  | -0.038 | 0.006 | -0.043 | 0.095 | -0.049 | 0.058 | 0.043  | 0.035 | 0.060  | 0.059 | 0.012  | 0.083 |
| Urate | rs729761   | POLR1C       | G | 53.31  | 0.046  | 0.006 | -0.045 | 0.103 | -0.023 | 0.063 | 0.020  | 0.038 | 0.060  | 0.064 | 0.002  | 0.090 |
| Urate | rs7654258  | LOC107986260 | T | 98.01  | -0.099 | 0.010 | 0.130  | 0.167 | -0.069 | 0.102 | -0.122 | 0.061 | 0.062  | 0.104 | -0.060 | 0.146 |

\*: The F-statistic for each SNPs was calculated by the following formula:  $F\text{-statistic} = \text{Beta}^2/\text{SE}^2$

**Table S4 The causal effect estimates of the associations between genetic instrumental variables for circulating antioxidant metabolites and risk of five digestive system cancers.**

| Trait        | SNP        | Gene              | Effect allele | F-statistic * | Exposure |       | Outcome           |       |                |       |              |       |                   |       |              |       |
|--------------|------------|-------------------|---------------|---------------|----------|-------|-------------------|-------|----------------|-------|--------------|-------|-------------------|-------|--------------|-------|
|              |            |                   |               |               |          |       | Esophageal cancer |       | Stomach cancer |       | Colon cancer |       | Pancreatic cancer |       | Liver cancer |       |
|              |            |                   |               |               | Beta     | SE    | Beta              | SE    | Beta           | SE    | Beta         | SE    | Beta              | SE    | Beta         | SE    |
| UK Biobank   |            |                   |               |               |          |       |                   |       |                |       |              |       |                   |       |              |       |
| α-Tocopherol | rs10163969 | -                 | T             | 19.36         | -0.035   | 0.008 | -0.176            | 0.119 | 0.031          | 0.134 | 0.020        | 0.061 | 0.115             | 0.121 | 0.201        | 0.159 |
| α-Tocopherol | rs10245705 | LOC105375199      | T             | 27.25         | -0.066   | 0.013 | -0.119            | 0.169 | -0.204         | 0.191 | 0.012        | 0.087 | 0.132             | 0.172 | 0.248        | 0.226 |
| α-Tocopherol | rs10935814 | -                 | A             | 19.87         | -0.037   | 0.008 | 0.010             | 0.070 | 0.019          | 0.079 | 0.029        | 0.036 | 0.185             | 0.071 | 0.109        | 0.094 |
| α-Tocopherol | rs11145330 | -                 | C             | 22.7          | -0.032   | 0.007 | 0.018             | 0.072 | 0.010          | 0.081 | -0.044       | 0.037 | 0.028             | 0.073 | 0.078        | 0.096 |
| α-Tocopherol | rs11992435 | -                 | G             | 20.63         | -0.033   | 0.007 | 0.160             | 0.099 | -0.011         | 0.111 | -0.044       | 0.051 | 0.093             | 0.101 | -0.003       | 0.133 |
| α-Tocopherol | rs1404410  | -                 | G             | 20.6          | 0.024    | 0.005 | 0.025             | 0.057 | 0.029          | 0.065 | 0.031        | 0.030 | 0.030             | 0.059 | -0.049       | 0.077 |
| α-Tocopherol | rs1532701  | SLC6A2            | A             | 20.85         | 0.014    | 0.003 | -0.019            | 0.046 | -0.056         | 0.052 | -0.012       | 0.024 | 0.042             | 0.047 | 0.039        | 0.061 |
| α-Tocopherol | rs2074731  | SF3A1             | A             | 22.26         | -0.018   | 0.004 | -0.006            | 0.062 | -0.016         | 0.070 | -0.009       | 0.032 | -0.068            | 0.063 | 0.058        | 0.083 |
| α-Tocopherol | rs261342   | LIPC/<br>LIPC-AS1 | C             | 20.86         | -0.017   | 0.004 | -0.078            | 0.055 | -0.015         | 0.062 | 0.006        | 0.028 | 0.003             | 0.056 | -0.012       | 0.074 |
| α-Tocopherol | rs7238006  | -                 | C             | 24.3          | -0.028   | 0.006 | -0.041            | 0.091 | -0.196         | 0.102 | -0.021       | 0.046 | -0.113            | 0.092 | -0.126       | 0.121 |
| α-Tocopherol | rs7930821  | ZDHHC13           | T             | 19.98         | 0.067    | 0.015 | -0.294            | 0.166 | 0.062          | 0.187 | -0.135       | 0.086 | -0.137            | 0.169 | -0.149       | 0.222 |
| γ-Tocopherol | rs10077932 | -                 | T             | 21.35         | -0.040   | 0.009 | 0.064             | 0.059 | 0.0001         | 0.067 | 0.063        | 0.030 | -0.106            | 0.06  | 0.029        | 0.079 |
| γ-Tocopherol | rs1013104  | -                 | T             | 21.16         | -0.021   | 0.005 | -0.017            | 0.046 | 0.040          | 0.052 | 0.007        | 0.024 | -0.099            | 0.047 | -0.008       | 0.062 |
| γ-Tocopherol | rs10466757 | BCAT1             | T             | 19.66         | -0.063   | 0.014 | 0.068             | 0.053 | 0.132          | 0.059 | -0.037       | 0.027 | 0.045             | 0.053 | -0.019       | 0.070 |
| γ-Tocopherol | rs10492212 | -                 | T             | 19.53         | -0.027   | 0.006 | 0.058             | 0.062 | 0.065          | 0.070 | -0.036       | 0.032 | -0.039            | 0.064 | -0.060       | 0.083 |
| γ-Tocopherol | rs10520845 | MYO10             | A             | 20.78         | 0.191    | 0.042 | -0.166            | 0.213 | -0.151         | 0.240 | 0.027        | 0.110 | -0.024            | 0.217 | 0.214        | 0.286 |
| γ-Tocopherol | rs1060467  | CYP4F11           | G             | 26.81         | -0.023   | 0.005 | -0.046            | 0.046 | -0.017         | 0.052 | 0.026        | 0.024 | -0.089            | 0.047 | -0.066       | 0.062 |
| γ-Tocopherol | rs13336771 | LONP2             | A             | 20.15         | 0.062    | 0.014 | 0.008             | 0.064 | -0.003         | 0.072 | 0.006        | 0.033 | 0.042             | 0.065 | -0.118       | 0.085 |
| γ-Tocopherol | rs261301   | -                 | C             | 22.56         | -0.032   | 0.007 | -0.029            | 0.066 | 0.033          | 0.074 | -0.018       | 0.034 | 0.195             | 0.067 | -0.069       | 0.088 |
| γ-Tocopherol | rs2794327  | MEGF6             | T             | 19.69         | -0.036   | 0.008 | 0.003             | 0.049 | -0.017         | 0.076 | 0.005        | 0.025 | 0.085             | 0.05  | 0.032        | 0.066 |
| γ-Tocopherol | rs5994305  | SEC14L2           | G             | 24.52         | -0.031   | 0.006 | -0.018            | 0.061 | -0.048         | 0.069 | -0.018       | 0.031 | -0.077            | 0.062 | 0.034        | 0.082 |
| γ-Tocopherol | rs6821770  | SORCS2            | A             | 19.52         | 0.038    | 0.009 | 0.015             | 0.060 | -0.089         | 0.067 | -0.036       | 0.031 | -0.008            | 0.061 | -0.001       | 0.080 |



|                      |             |              |   |       |        |       |        |       |        |       |        |       |        |       |        |       |
|----------------------|-------------|--------------|---|-------|--------|-------|--------|-------|--------|-------|--------|-------|--------|-------|--------|-------|
| $\gamma$ -Tocopherol | rs7038957   | -            | C | 21.43 | 0.029  | 0.006 | 0.002  | 0.061 | 0.082  | 0.069 | 0.045  | 0.031 | 0.013  | 0.062 | 0.016  | 0.082 |
| $\gamma$ -Tocopherol | rs7350776   | RYR3         | G | 21.12 | -0.024 | 0.005 | -0.015 | 0.050 | 0.042  | 0.056 | 0.026  | 0.026 | 0.010  | 0.051 | -0.036 | 0.066 |
| Ascorbate            | rs11167905  | -            | C | 24.03 | -0.080 | 0.016 | 0.062  | 0.063 | -0.043 | 0.071 | 0.055  | 0.033 | -0.083 | 0.064 | 0.007  | 0.084 |
| Ascorbate            | rs13069990  | LSAMP        | T | 21.16 | -0.051 | 0.011 | 0.073  | 0.047 | 0.036  | 0.053 | 0.052  | 0.024 | 0.047  | 0.048 | -0.098 | 0.063 |
| Ascorbate            | rs13103690  | SLC2A9       | G | 20.77 | 0.047  | 0.010 | 0.045  | 0.046 | 0.008  | 0.051 | -0.015 | 0.024 | -0.059 | 0.047 | -0.091 | 0.061 |
| Ascorbate            | rs2070006   | FGA          | C | 20.9  | -0.051 | 0.011 | 0.014  | 0.047 | -0.024 | 0.053 | -0.027 | 0.024 | -0.076 | 0.048 | 0.070  | 0.063 |
| Ascorbate            | rs577596    | -            | A | 24.74 | -0.057 | 0.011 | 0.005  | 0.048 | 0.020  | 0.054 | 0.011  | 0.025 | -0.046 | 0.049 | -0.055 | 0.064 |
| Ascorbate            | rs6713914   | LOC105374754 | C | 26.13 | -0.059 | 0.012 | 0.014  | 0.046 | 0.012  | 0.051 | 0.018  | 0.024 | -0.036 | 0.047 | -0.011 | 0.061 |
| Ascorbate            | rs6826474   | -            | T | 23.06 | -0.138 | 0.029 | -0.084 | 0.143 | 0.054  | 0.161 | 0.014  | 0.074 | 0.023  | 0.145 | 0.204  | 0.191 |
| Ascorbate            | rs6834631   | LOC107986309 | G | 23.93 | -0.131 | 0.027 | 0.210  | 0.110 | -0.210 | 0.124 | -0.033 | 0.057 | -0.118 | 0.113 | -0.027 | 0.148 |
| Ascorbate            | rs7112460   | HYLS1        | T | 23.63 | 0.108  | 0.022 | -0.112 | 0.094 | -0.092 | 0.106 | -0.007 | 0.048 | -0.032 | 0.096 | -0.013 | 0.126 |
| Ascorbate            | rs8057559   | ZFHX3        | T | 19.74 | 0.140  | 0.031 | -0.317 | 0.140 | -0.139 | 0.157 | -0.075 | 0.072 | 0.076  | 0.143 | 0.422  | 0.187 |
| Ascorbate            | rs808686    | -            | A | 21.83 | 0.060  | 0.013 | -0.028 | 0.046 | -0.034 | 0.051 | 0.020  | 0.024 | -0.004 | 0.047 | -0.002 | 0.061 |
| Ascorbate            | rs8105491   | -            | T | 22.24 | -0.070 | 0.015 | 0.044  | 0.064 | -0.041 | 0.072 | 0.014  | 0.033 | 0.012  | 0.065 | 0.011  | 0.085 |
| Ascorbate            | rs9419004   | ADGRA1       | C | 20.35 | -0.254 | 0.056 | -0.061 | 0.051 | 0.041  | 0.057 | 0.002  | 0.026 | -0.067 | 0.052 | 0.021  | 0.068 |
| Ascorbate            | rs9606290   | LOC105372863 | A | 20.4  | 0.159  | 0.035 | -0.030 | 0.053 | 0.007  | 0.059 | -0.012 | 0.027 | 0.104  | 0.054 | -0.006 | 0.071 |
| Retinol              | rs10019071  | -            | A | 16.72 | 0.657  | 0.161 | -0.198 | 0.167 | 0.126  | 0.187 | -0.032 | 0.085 | 0.085  | 0.169 | -0.330 | 0.223 |
| Retinol              | rs112293959 | ZFAND6       | G | 10.88 | -0.429 | 0.130 | -0.065 | 0.129 | -0.116 | 0.145 | 0.013  | 0.066 | -0.010 | 0.131 | 0.238  | 0.172 |
| Retinol              | rs114515641 | IGSF11       | G | 10.32 | 0.414  | 0.129 | -0.128 | 0.134 | -0.273 | 0.151 | 0.117  | 0.069 | -0.152 | 0.136 | -0.221 | 0.178 |
| Retinol              | rs1153379   | -            | A | 14.97 | -0.323 | 0.083 | -0.010 | 0.095 | -0.005 | 0.107 | 0.076  | 0.049 | 0.051  | 0.097 | -0.205 | 0.127 |
| Retinol              | rs117468033 | -            | T | 26.23 | -0.961 | 0.188 | -      | -     | -      | -     | -      | -     | -      | -     | -      | -     |
| Retinol              | rs1176744   | HTR3B        | C | 20.97 | -0.207 | 0.045 | 0.023  | 0.049 | 0.010  | 0.055 | -0.013 | 0.025 | 0.046  | 0.05  | -0.022 | 0.066 |
| Retinol              | rs118025446 | CEP162       | A | 17.38 | -0.481 | 0.115 | 0.079  | 0.116 | 0.165  | 0.131 | 0.033  | 0.06  | -0.033 | 0.119 | 0.221  | 0.156 |
| Retinol              | rs12955464  | -            | G | 14.79 | -0.234 | 0.061 | -0.012 | 0.065 | 0.077  | 0.073 | -0.021 | 0.033 | 0.067  | 0.066 | -0.012 | 0.087 |
| Retinol              | rs139726207 | -            | G | 11.21 | 0.370  | 0.110 | -0.181 | 0.095 | -0.067 | 0.107 | 0.042  | 0.049 | 0.103  | 0.096 | 0.047  | 0.127 |
| Retinol              | rs149113848 | -            | G | 13.21 | -0.964 | 0.265 | -0.468 | 0.268 | -0.004 | 0.300 | -0.031 | 0.137 | 0.135  | 0.271 | 0.258  | 0.356 |
| Retinol              | rs149478645 | CTTNBP2      | G | 12.79 | -0.507 | 0.142 | 0.024  | 0.154 | -0.135 | 0.173 | 0.072  | 0.079 | 0.121  | 0.157 | -0.169 | 0.206 |
| Retinol              | rs17005512  | -            | C | 13.33 | -0.218 | 0.060 | -0.064 | 0.063 | -0.015 | 0.071 | 0.022  | 0.033 | -0.011 | 0.064 | -0.009 | 0.085 |

|         |             |                  |   |       |        |       |        |       |        |       |             |       |        |       |        |       |
|---------|-------------|------------------|---|-------|--------|-------|--------|-------|--------|-------|-------------|-------|--------|-------|--------|-------|
| Retinol | rs1842947   | OR3A3            | G | 20.06 | -0.192 | 0.043 | -0.015 | 0.046 | -0.004 | 0.052 | -0.045      | 0.024 | 0.027  | 0.047 | 0.088  | 0.061 |
| Retinol | rs2147337   | SIRPG            | G | 12.68 | 0.158  | 0.044 | -0.054 | 0.048 | -0.063 | 0.053 | -<br>0.0003 | 0.024 | 0.032  | 0.048 | 0.101  | 0.064 |
| Retinol | rs2367816   | LOC1053744<br>55 | G | 19.64 | 0.228  | 0.051 | -0.066 | 0.054 | 0.018  | 0.060 | 0.019       | 0.028 | 0.009  | 0.055 | 0.191  | 0.072 |
| Retinol | rs2417325   | -                | T | 15.49 | 0.329  | 0.084 | -0.113 | 0.089 | 0.007  | 0.101 | -0.034      | 0.046 | 0.002  | 0.091 | 0.037  | 0.119 |
| Retinol | rs3890033   | TNK2             | C | 11.76 | 0.144  | 0.042 | -0.030 | 0.046 | -0.094 | 0.052 | -0.026      | 0.024 | -0.048 | 0.047 | 0.045  | 0.062 |
| Retinol | rs3898702   | LOC1019273<br>94 | T | 16.35 | -0.217 | 0.054 | 0.082  | 0.057 | 0.043  | 0.064 | -0.024      | 0.029 | 0.039  | 0.058 | -0.011 | 0.076 |
| Retinol | rs4135385   | CTNNB1           | G | 18.75 | 0.212  | 0.049 | 0.040  | 0.054 | 0.012  | 0.061 | 0.077       | 0.028 | -0.012 | 0.055 | 0.065  | 0.072 |
| Retinol | rs568632536 | -                | T | 14.35 | 0.531  | 0.140 | -      | -     | -      | -     | -           | -     | -      | -     | -      | -     |
| Retinol | rs58411567  | DNAH10           | A | 15.92 | -0.208 | 0.052 | 0.051  | 0.054 | 0.047  | 0.061 | 0.039       | 0.028 | 0.041  | 0.056 | -0.060 | 0.073 |
| Retinol | rs6550239   | RAB5A            | A | 14.51 | -0.183 | 0.048 | 0.018  | 0.055 | -0.006 | 0.062 | 0.044       | 0.028 | 0.078  | 0.056 | -0.038 | 0.073 |
| Retinol | rs75308833  | -                | T | 11.27 | -0.494 | 0.147 | -0.041 | 0.144 | 0.021  | 0.162 | -0.066      | 0.074 | -0.170 | 0.146 | -0.303 | 0.193 |
| Retinol | rs7926028   | -                | T | 10.39 | -0.135 | 0.042 | -0.042 | 0.046 | -0.085 | 0.051 | -0.003      | 0.023 | 0.013  | 0.046 | -0.026 | 0.061 |
| Retinol | rs945817    | LOC1053778<br>58 | A | 25.32 | -0.275 | 0.055 | 0.130  | 0.058 | 0.218  | 0.065 | -0.006      | 0.03  | -0.041 | 0.059 | 0.085  | 0.077 |
| Retinol | rs9586119   | -                | C | 18.24 | 0.355  | 0.083 | -0.065 | 0.081 | 0.062  | 0.091 | -0.048      | 0.042 | -0.150 | 0.083 | 0.059  | 0.109 |
| Urate   | rs10490734  | THSD7B           | G | 20.52 | -0.008 | 0.002 | -0.098 | 0.061 | -0.125 | 0.069 | 0.033       | 0.032 | 0.046  | 0.062 | 0.039  | 0.082 |
| Urate   | rs10844317  | DNM1L            | T | 22.83 | -0.009 | 0.002 | 0.046  | 0.066 | 0.173  | 0.074 | -0.003      | 0.034 | 0.046  | 0.067 | -0.159 | 0.088 |
| Urate   | rs11130013  | -                | T | 20.25 | -0.008 | 0.002 | 0.051  | 0.063 | 0.089  | 0.071 | -0.022      | 0.032 | -0.002 | 0.064 | 0.092  | 0.084 |
| Urate   | rs11741189  | RASGEF1C         | T | 26.19 | -0.009 | 0.002 | 0.079  | 0.061 | 0.077  | 0.069 | 0.001       | 0.032 | 0.022  | 0.062 | -0.028 | 0.082 |
| Urate   | rs1286087   | RPS6KA5          | C | 20.52 | -0.008 | 0.002 | 0.007  | 0.064 | 0.075  | 0.072 | 0.002       | 0.033 | -0.051 | 0.065 | -0.124 | 0.085 |
| Urate   | rs13318012  | -                | C | 21.05 | 0.008  | 0.002 | -0.040 | 0.058 | -0.013 | 0.065 | -0.024      | 0.030 | 0.001  | 0.059 | -0.046 | 0.078 |
| Urate   | rs16953268  | LINC02169        | A | 19.56 | -0.012 | 0.003 | -0.105 | 0.091 | -0.219 | 0.102 | 0.032       | 0.047 | -0.051 | 0.092 | 0.170  | 0.121 |
| Urate   | rs2231142   | ABCG2            | T | 24.59 | 0.012  | 0.002 | 0.078  | 0.072 | 0.150  | 0.081 | 0.015       | 0.037 | 0.009  | 0.073 | 0.115  | 0.096 |
| Urate   | rs233340    | -                | A | 23.11 | -0.013 | 0.003 | -0.072 | 0.088 | -0.101 | 0.099 | -0.029      | 0.045 | 0.036  | 0.09  | 0.057  | 0.118 |
| Urate   | rs235320    | PTTG1IP          | G | 21.6  | 0.008  | 0.002 | -0.044 | 0.058 | 0.030  | 0.065 | -0.029      | 0.03  | 0.040  | 0.059 | 0.003  | 0.077 |
| Urate   | rs510032    | LOC1053731<br>16 | C | 20.25 | -0.009 | 0.002 | 0.022  | 0.058 | 0.066  | 0.066 | 0.028       | 0.03  | -0.057 | 0.059 | -0.018 | 0.078 |
| Urate   | rs6731691   | ITGA6            | A | 19.75 | -0.008 | 0.002 | -0.014 | 0.061 | -0.053 | 0.069 | -0.002      | 0.032 | 0.003  | 0.063 | 0.021  | 0.082 |

|       |           |                  |   |        |       |       |        |       |        |       |        |       |        |       |        |       |
|-------|-----------|------------------|---|--------|-------|-------|--------|-------|--------|-------|--------|-------|--------|-------|--------|-------|
| Urate | rs6927639 | -                | G | 18.78  | 0.008 | 0.002 | -0.059 | 0.064 | -0.072 | 0.072 | -0.043 | 0.033 | 0.020  | 0.065 | 0.172  | 0.085 |
| Urate | rs7906282 | LOC1053764<br>40 | T | 25     | 0.008 | 0.002 | -0.002 | 0.049 | 0.009  | 0.055 | -0.007 | 0.025 | -0.015 | 0.05  | -0.081 | 0.066 |
| Urate | rs872114  | -                | C | 22.35  | 0.021 | 0.004 | 0.177  | 0.135 | 0.136  | 0.152 | 0.017  | 0.070 | 0.070  | 0.138 | 0.289  | 0.18  |
| Urate | rs938554  | SLC2A9           | G | 419.04 | 0.035 | 0.002 | 0.041  | 0.055 | 0.009  | 0.062 | -0.007 | 0.029 | 0.010  | 0.056 | 0.055  | 0.074 |
| Urate | rs9549021 | -                | C | 21.67  | 0.014 | 0.003 | 0.084  | 0.047 | -0.053 | 0.053 | -0.018 | 0.024 | 0.018  | 0.048 | -0.036 | 0.063 |
| Urate | rs9557545 | NALCN-AS1        | A | 20.25  | 0.018 | 0.004 | 0.183  | 0.137 | 0.144  | 0.154 | -0.062 | 0.07  | -0.187 | 0.139 | -0.302 | 0.183 |

# FinnGen

|                      |            |                  |   |       |        |       |        |       |        |       |        |       |        |       |        |       |
|----------------------|------------|------------------|---|-------|--------|-------|--------|-------|--------|-------|--------|-------|--------|-------|--------|-------|
| $\alpha$ -Tocopherol | rs10163969 | -                | T | 19.36 | -0.035 | 0.008 | 0.156  | 0.144 | -0.137 | 0.088 | -0.011 | 0.053 | 0.089  | 0.089 | -0.183 | 0.124 |
| $\alpha$ -Tocopherol | rs10245705 | LOC1053751<br>99 | T | 27.25 | -0.066 | 0.013 | -0.307 | 0.388 | 0.152  | 0.233 | -0.143 | 0.139 | -0.627 | 0.252 | -7E-04 | 0.359 |
| $\alpha$ -Tocopherol | rs10935814 | -                | A | 19.87 | -0.037 | 0.008 | -0.238 | 0.148 | 0.061  | 0.09  | -0.110 | 0.054 | 0.040  | 0.092 | 0.006  | 0.129 |
| $\alpha$ -Tocopherol | rs11145330 | -                | C | 22.7  | -0.032 | 0.007 | -0.232 | 0.131 | -0.087 | 0.079 | 0.075  | 0.048 | -0.094 | 0.081 | 0.073  | 0.113 |
| $\alpha$ -Tocopherol | rs11992435 | -                | G | 20.63 | -0.033 | 0.007 | -0.166 | 0.225 | -0.030 | 0.138 | -0.179 | 0.083 | -0.133 | 0.141 | 0.171  | 0.197 |
| $\alpha$ -Tocopherol | rs1404410  | -                | G | 20.6  | 0.024  | 0.005 | -0.075 | 0.117 | -0.100 | 0.071 | -0.005 | 0.043 | 0.130  | 0.073 | -0.058 | 0.102 |
| $\alpha$ -Tocopherol | rs1532701  | SLC6A2           | A | 20.85 | 0.014  | 0.003 | -0.034 | 0.094 | 0.008  | 0.057 | 0.053  | 0.034 | -0.069 | 0.059 | 0.141  | 0.082 |
| $\alpha$ -Tocopherol | rs2074731  | SF3A1            | A | 22.26 | -0.018 | 0.004 | 0.137  | 0.121 | 0.016  | 0.073 | 0.012  | 0.044 | -0.046 | 0.075 | 0.019  | 0.104 |
| $\alpha$ -Tocopherol | rs261342   | LIPC/            | C | 20.86 | -0.017 | 0.004 | -0.005 | 0.113 | -0.063 | 0.069 | 0.017  | 0.041 | 0.054  | 0.07  | -0.034 | 0.098 |
| $\alpha$ -Tocopherol | rs7238006  | LIPC-AS1         | C | 24.3  | -0.028 | 0.006 | 0.048  | 0.136 | -4E-04 | 0.083 | -0.004 | 0.05  | -0.065 | 0.085 | 0.082  | 0.119 |
| $\alpha$ -Tocopherol | rs7930821  | -                | T | 19.98 | 0.067  | 0.015 | 0.762  | 0.447 | 0.018  | 0.275 | 0.054  | 0.165 | -0.295 | 0.288 | -0.346 | 0.411 |
| $\gamma$ -Tocopherol | rs10077932 | ZDHHC13          | T | 21.35 | -0.040 | 0.009 | -0.054 | 0.12  | -0.083 | 0.073 | -0.044 | 0.044 | -0.063 | 0.075 | 0.004  | 0.105 |
| $\gamma$ -Tocopherol | rs1013104  | -                | T | 21.16 | -0.021 | 0.005 | 0.071  | 0.094 | 0.029  | 0.057 | 0.025  | 0.034 | -0.015 | 0.059 | 0.098  | 0.082 |
| $\gamma$ -Tocopherol | rs10466757 | -                | T | 19.66 | -0.063 | 0.014 | -0.147 | 0.106 | 0.028  | 0.065 | 0.011  | 0.039 | -0.011 | 0.066 | -0.172 | 0.093 |
| $\gamma$ -Tocopherol | rs10492212 | BCAT1            | T | 19.53 | -0.027 | 0.006 | 0.124  | 0.12  | 0.16   | 0.073 | 0.040  | 0.044 | 0.019  | 0.075 | 0.043  | 0.104 |
| $\gamma$ -Tocopherol | rs10520845 | -                | A | 20.78 | 0.191  | 0.042 | 0.236  | 0.362 | 0.01   | 0.222 | -0.047 | 0.134 | 0.201  | 0.224 | -0.112 | 0.316 |
| $\gamma$ -Tocopherol | rs1060467  | MYO10            | G | 26.81 | -0.023 | 0.005 | 0.039  | 0.094 | 0.062  | 0.057 | 0.002  | 0.034 | 0.097  | 0.059 | -0.104 | 0.082 |
| $\gamma$ -Tocopherol | rs13336771 | CYP4F11          | A | 20.15 | 0.062  | 0.014 | 0.083  | 0.126 | 0.024  | 0.077 | 0.098  | 0.046 | -0.028 | 0.078 | -0.027 | 0.11  |
| $\gamma$ -Tocopherol | rs261301   | LONP2            | C | 22.56 | -0.032 | 0.007 | -0.052 | 0.125 | 0.009  | 0.076 | 0.004  | 0.046 | 0.036  | 0.078 | -0.117 | 0.109 |
| $\gamma$ -Tocopherol | rs2794327  | -                | T | 19.69 | -0.036 | 0.008 | -0.057 | 0.100 | 0.06   | 0.061 | 0.010  | 0.037 | 0.003  | 0.062 | 0.034  | 0.087 |
| $\gamma$ -Tocopherol | rs5994305  | MEGF6            | G | 24.52 | -0.031 | 0.006 | 0.137  | 0.120 | 0.038  | 0.073 | -0.012 | 0.044 | -0.048 | 0.074 | 0.031  | 0.103 |
| $\gamma$ -Tocopherol | rs6821770  | SEC14L2          | A | 19.52 | 0.038  | 0.009 | 0.237  | 0.112 | 0.071  | 0.068 | -0.005 | 0.041 | 0.010  | 0.070 | -0.029 | 0.097 |

|              |             |              |   |       |        |       |        |       |        |       |        |       |        |       |        |       |
|--------------|-------------|--------------|---|-------|--------|-------|--------|-------|--------|-------|--------|-------|--------|-------|--------|-------|
| γ-Tocopherol | rs7038957   | SORCS2       | C | 21.43 | 0.029  | 0.006 | -0.129 | 0.130 | 0.033  | 0.079 | 0.045  | 0.047 | -0.062 | 0.081 | -0.134 | 0.112 |
| γ-Tocopherol | rs7350776   | -            | G | 21.12 | -0.024 | 0.005 | 0.080  | 0.099 | 0.11   | 0.06  | 0.011  | 0.036 | -0.017 | 0.062 | -0.072 | 0.087 |
| Ascorbate    | rs11167905  | RYR3         | C | 24.03 | -0.080 | 0.016 | 0.197  | 0.141 | 0.031  | 0.086 | -0.015 | 0.051 | 0.011  | 0.088 | -0.009 | 0.123 |
| Ascorbate    | rs13069990  | -            | T | 21.16 | -0.051 | 0.011 | 0.084  | 0.097 | 0.039  | 0.059 | 0.045  | 0.035 | -0.052 | 0.06  | 0.088  | 0.084 |
| Ascorbate    | rs13103690  | LSAMP        | G | 20.77 | 0.047  | 0.010 | 0.076  | 0.094 | 0.064  | 0.057 | 0.043  | 0.034 | -0.011 | 0.059 | 0.012  | 0.082 |
| Ascorbate    | rs2070006   | SLC2A9       | C | 20.9  | -0.051 | 0.011 | -0.055 | 0.094 | 0.007  | 0.057 | 0.017  | 0.034 | 0.071  | 0.058 | -0.047 | 0.082 |
| Ascorbate    | rs577596    | FGA          | A | 24.74 | -0.057 | 0.011 | -0.151 | 0.096 | -0.062 | 0.058 | -0.013 | 0.035 | -0.013 | 0.06  | 0.006  | 0.083 |
| Ascorbate    | rs6713914   | -            | C | 26.13 | -0.059 | 0.012 | 0.236  | 0.095 | 0.004  | 0.057 | -0.005 | 0.035 | 0.03   | 0.059 | -0.007 | 0.082 |
| Ascorbate    | rs6826474   | LOC105374754 | T | 23.06 | -0.138 | 0.029 | 0.612  | 0.331 | 0.252  | 0.201 | -0.122 | 0.119 | 0.291  | 0.208 | 0.101  | 0.295 |
| Ascorbate    | rs6834631   | -            | G | 23.93 | -0.131 | 0.027 | 0.195  | 0.335 | -0.114 | 0.201 | 0.085  | 0.122 | -0.326 | 0.213 | -0.219 | 0.299 |
| Ascorbate    | rs7112460   | LOC107986309 | T | 23.63 | 0.108  | 0.022 | -0.008 | 0.219 | -0.115 | 0.132 | -0.098 | 0.079 | 0.107  | 0.137 | -0.072 | 0.191 |
| Ascorbate    | rs8057559   | HYLS1        | T | 19.74 | 0.140  | 0.031 | -0.621 | 0.291 | -0.158 | 0.176 | -0.128 | 0.106 | 0.039  | 0.179 | -0.091 | 0.250 |
| Ascorbate    | rs808686    | ZFHX3        | A | 21.83 | 0.060  | 0.013 | 0.027  | 0.096 | -0.020 | 0.058 | 0.003  | 0.035 | 0.003  | 0.060 | -0.111 | 0.084 |
| Ascorbate    | rs8105491   | -            | T | 22.24 | -0.070 | 0.015 | -0.176 | 0.123 | 0.123  | 0.074 | 0.116  | 0.045 | -0.075 | 0.077 | -0.049 | 0.107 |
| Ascorbate    | rs9419004   | -            | C | 20.35 | -0.254 | 0.056 | -0.014 | 0.111 | 0.076  | 0.067 | -0.01  | 0.041 | 0.065  | 0.069 | 0.137  | 0.097 |
| Ascorbate    | rs9606290   | ADGRA1       | A | 20.4  | 0.159  | 0.035 | 0.034  | 0.128 | -0.007 | 0.078 | -0.013 | 0.046 | -0.039 | 0.080 | -0.068 | 0.112 |
| Retinol      | rs10019071  | -            | A | 16.72 | 0.657  | 0.161 | -0.005 | 0.586 | 0.441  | 0.351 | -0.389 | 0.213 | -0.015 | 0.384 | -0.262 | 0.541 |
| Retinol      | rs112293959 | ZFAND6       | G | 10.88 | -0.429 | 0.130 | 0.266  | 0.318 | -0.089 | 0.196 | -0.018 | 0.115 | -0.155 | 0.201 | 0.342  | 0.28  |
| Retinol      | rs114515641 | IGSF11       | G | 10.32 | 0.414  | 0.129 | 0.156  | 0.285 | 0.455  | 0.172 | 0.062  | 0.103 | -0.108 | 0.181 | -0.299 | 0.251 |
| Retinol      | rs1153379   | -            | A | 14.97 | -0.323 | 0.083 | 0.118  | 0.203 | 0.132  | 0.123 | -0.039 | 0.074 | 0.11   | 0.125 | -0.141 | 0.174 |
| Retinol      | rs117468033 | -            | T | 26.23 | -0.961 | 0.188 | -0.118 | 0.413 | 0.123  | 0.247 | -0.143 | 0.149 | -0.002 | 0.254 | -0.262 | 0.352 |
| Retinol      | rs1176744   | HTR3B        | C | 20.97 | -0.207 | 0.045 | -0.044 | 0.102 | -0.011 | 0.062 | -0.007 | 0.037 | -0.048 | 0.064 | 0.145  | 0.089 |
| Retinol      | rs118025446 | CEP162       | A | 17.38 | -0.481 | 0.115 | -0.183 | 0.327 | 0.157  | 0.198 | -0.085 | 0.119 | -0.413 | 0.206 | -0.094 | 0.292 |
| Retinol      | rs12955464  | -            | G | 14.79 | -0.234 | 0.061 | 0.023  | 0.141 | 0.014  | 0.086 | -0.067 | 0.051 | 0.06   | 0.088 | -0.031 | 0.124 |
| Retinol      | rs139726207 | -            | G | 11.21 | 0.370  | 0.110 | 0.102  | 0.176 | -0.015 | 0.106 | -0.045 | 0.064 | -0.028 | 0.109 | 0.127  | 0.154 |
| Retinol      | rs149113848 | -            | G | 13.21 | -0.964 | 0.265 | -1.034 | 0.770 | 0.281  | 0.467 | -0.289 | 0.276 | 0.177  | 0.482 | -0.552 | 0.680 |
| Retinol      | rs149478645 | CTTNBP2      | G | 12.79 | -0.507 | 0.142 | 0.356  | 0.416 | -0.069 | 0.248 | 0.306  | 0.148 | -0.27  | 0.263 | 0.743  | 0.366 |
| Retinol      | rs17005512  | -            | C | 13.33 | -0.218 | 0.060 | 0.080  | 0.122 | 0.079  | 0.074 | 0.041  | 0.044 | -0.077 | 0.076 | 0.109  | 0.106 |
| Retinol      | rs1842947   | OR3A3        | G | 20.06 | -0.192 | 0.043 | 0.101  | 0.095 | -0.029 | 0.058 | 0.007  | 0.035 | 0.025  | 0.059 | 0.049  | 0.083 |

|         |             |                  |   |       |        |       |        |       |        |       |        |       |        |       |        |       |
|---------|-------------|------------------|---|-------|--------|-------|--------|-------|--------|-------|--------|-------|--------|-------|--------|-------|
| Retinol | rs2147337   | SIRPG            | G | 12.68 | 0.158  | 0.044 | -0.049 | 0.102 | 0.027  | 0.062 | 0.009  | 0.037 | 0.06   | 0.064 | -0.038 | 0.089 |
| Retinol | rs2367816   | LOC1053744<br>55 | G | 19.64 | 0.228  | 0.051 | -0.109 | 0.110 | 0.048  | 0.067 | -0.025 | 0.040 | 0.057  | 0.069 | 0.031  | 0.096 |
| Retinol | rs2417325   | -                | T | 15.49 | 0.329  | 0.084 | 0.298  | 0.158 | 0.087  | 0.096 | 0.064  | 0.058 | -0.033 | 0.098 | 0.004  | 0.137 |
| Retinol | rs3890033   | TNK2             | C | 11.76 | 0.144  | 0.042 | 0.024  | 0.094 | 0.076  | 0.057 | -0.020 | 0.035 | 0.032  | 0.059 | 0.013  | 0.082 |
| Retinol | rs3898702   | LOC1019273<br>94 | T | 16.35 | -0.217 | 0.054 | -0.089 | 0.112 | 0.002  | 0.068 | 0.012  | 0.041 | -0.029 | 0.070 | -0.107 | 0.097 |
| Retinol | rs4135385   | CTNNB1           | G | 18.75 | 0.212  | 0.049 | 0.028  | 0.116 | -0.038 | 0.070 | 0.020  | 0.042 | -0.081 | 0.073 | -0.092 | 0.101 |
| Retinol | rs568632536 | -                | T | 14.35 | 0.531  | 0.140 | -      | -     | -      | -     | -      | -     | -      | -     | -      | -     |
| Retinol | rs58411567  | DNAH10           | A | 15.92 | -0.208 | 0.052 | 0.074  | 0.110 | -0.034 | 0.067 | -0.010 | 0.04  | 0.097  | 0.069 | 0.182  | 0.096 |
| Retinol | rs6550239   | RAB5A            | A | 14.51 | -0.183 | 0.048 | 0.154  | 0.107 | -0.019 | 0.065 | 0.007  | 0.039 | -0.031 | 0.066 | 0.153  | 0.093 |
| Retinol | rs75308833  | -                | T | 11.27 | -0.494 | 0.147 | -0.643 | 0.388 | 0.056  | 0.238 | 0.141  | 0.141 | -0.283 | 0.241 | 0.265  | 0.342 |
| Retinol | rs7926028   | -                | T | 10.39 | -0.135 | 0.042 | -0.155 | 0.225 | 0.191  | 0.137 | 0.094  | 0.082 | -0.134 | 0.141 | 0.137  | 0.197 |
| Retinol | rs945817    | LOC1053778<br>58 | A | 25.32 | -0.275 | 0.055 | 0.039  | 0.148 | -0.106 | 0.09  | -0.122 | 0.054 | -0.147 | 0.093 | 0.203  | 0.131 |
| Retinol | rs9586119   | -                | C | 18.24 | 0.355  | 0.083 | 0.178  | 0.148 | 0.084  | 0.09  | -0.086 | 0.054 | -0.052 | 0.092 | 0.099  | 0.128 |
| Urate   | rs10490734  | THSD7B           | G | 20.52 | -0.008 | 0.002 | 0.113  | 0.114 | -0.028 | 0.069 | 0.075  | 0.041 | 0.080  | 0.070 | -0.146 | 0.098 |
| Urate   | rs10844317  | DNM1L            | T | 22.83 | -0.009 | 0.002 | -0.184 | 0.150 | 0.141  | 0.091 | 0.032  | 0.054 | 0.098  | 0.094 | 0.161  | 0.131 |
| Urate   | rs11130013  | -                | T | 20.25 | -0.008 | 0.002 | 0.040  | 0.161 | -0.045 | 0.098 | 0.057  | 0.058 | 0.055  | 0.101 | -0.064 | 0.141 |
| Urate   | rs11741189  | RASGEF1C         | T | 26.19 | -0.009 | 0.002 | -0.171 | 0.133 | -0.090 | 0.08  | -0.002 | 0.048 | -0.011 | 0.083 | 0.171  | 0.116 |
| Urate   | rs1286087   | RPS6KA5          | C | 20.52 | -0.008 | 0.002 | -0.274 | 0.159 | 0.091  | 0.097 | -0.059 | 0.058 | 0.066  | 0.099 | -0.161 | 0.139 |
| Urate   | rs13318012  | -                | C | 21.05 | 0.008  | 0.002 | 0.119  | 0.125 | 0.019  | 0.076 | -0.022 | 0.045 | -0.026 | 0.078 | 0.165  | 0.108 |
| Urate   | rs16953268  | LINC02169        | A | 19.56 | -0.012 | 0.003 | 0.238  | 0.221 | 0.004  | 0.135 | -0.149 | 0.08  | 0.055  | 0.140 | -0.092 | 0.196 |
| Urate   | rs2231142   | ABCG2            | T | 24.59 | 0.012  | 0.002 | -0.205 | 0.176 | -0.020 | 0.107 | -0.043 | 0.064 | 0.214  | 0.110 | 0.387  | 0.155 |
| Urate   | rs233340    | -                | A | 23.11 | -0.013 | 0.003 | 0.209  | 0.145 | -0.082 | 0.088 | 0.077  | 0.053 | 0.079  | 0.090 | -0.039 | 0.126 |
| Urate   | rs235320    | PTTG1IP          | G | 21.6  | 0.008  | 0.002 | 0.047  | 0.143 | -0.019 | 0.088 | -0.04  | 0.052 | -0.119 | 0.090 | 0.078  | 0.126 |
| Urate   | rs510032    | LOC1053731<br>16 | C | 20.25 | -0.009 | 0.002 | 6E-04  | 0.115 | -0.016 | 0.07  | -0.028 | 0.042 | -0.032 | 0.071 | 0.014  | 0.099 |
| Urate   | rs6731691   | ITGA6            | A | 19.75 | -0.008 | 0.002 | 0.154  | 0.130 | -0.056 | 0.079 | 0.082  | 0.047 | -0.097 | 0.082 | -0.066 | 0.114 |
| Urate   | rs6927639   | -                | G | 18.78 | 0.008  | 0.002 | -0.070 | 0.107 | 0.121  | 0.065 | 0.002  | 0.039 | 0.041  | 0.067 | 0.107  | 0.093 |

|       |           |                  |   |        |       |       |        |       |        |       |        |       |        |       |        |       |
|-------|-----------|------------------|---|--------|-------|-------|--------|-------|--------|-------|--------|-------|--------|-------|--------|-------|
| Urate | rs7906282 | LOC1053764<br>40 | T | 25     | 0.008 | 0.002 | -0.037 | 0.111 | -0.099 | 0.067 | -0.052 | 0.04  | -0.092 | 0.069 | 0.034  | 0.096 |
| Urate | rs872114  | -                | C | 22.35  | 0.021 | 0.004 | -0.282 | 0.508 | 0.175  | 0.305 | -0.007 | 0.181 | -0.174 | 0.324 | -0.633 | 0.454 |
| Urate | rs938554  | SLC2A9           | G | 419.04 | 0.035 | 0.002 | -0.052 | 0.124 | 0.069  | 0.075 | 0.057  | 0.045 | 0.120  | 0.077 | -0.108 | 0.108 |
| Urate | rs9549021 | -                | C | 21.67  | 0.014 | 0.003 | 0.133  | 0.097 | 0.058  | 0.059 | 0.007  | 0.035 | 0.054  | 0.060 | 0.001  | 0.084 |
| Urate | rs9557545 | NALCN-AS1        | A | 20.25  | 0.018 | 0.004 | -0.138 | 0.139 | -0.027 | 0.084 | 0.077  | 0.051 | -0.031 | 0.085 | 0.244  | 0.119 |

\*: The F-statistic for each SNPs was calculated by the following formula:  $F\text{-statistic} = \text{Beta}^2/\text{SE}^2$

**Table S5 The complementary MR analyses results of the causal effects of absolute circulating antioxidants on five digestive system cancers.**

| MR methods                | $\alpha$ -Tocopherol<br>(3 SNPs) |                     | Ascorbate<br>(10 SNPs) |                     | Retinol<br>(2 SNPs)    |                     | $\beta$ -Carotene<br>(2 SNPs) |                     | Lycopene<br>(5 SNPs)   |                     | Urate<br>(27 SNPs)     |                     |
|---------------------------|----------------------------------|---------------------|------------------------|---------------------|------------------------|---------------------|-------------------------------|---------------------|------------------------|---------------------|------------------------|---------------------|
|                           | OR (95%CI)                       | <i>P</i> -<br>Value | OR (95%CI)             | <i>P</i> -<br>Value | OR (95%CI)             | <i>P</i> -<br>Value | OR (95%CI)                    | <i>P</i> -<br>Value | OR (95%CI)             | <i>P</i> -<br>Value | OR (95%CI)             | <i>P</i> -<br>Value |
| <b>UK Biobank</b>         |                                  |                     |                        |                     |                        |                     |                               |                     |                        |                     |                        |                     |
| <b>Esophageal cancer</b>  |                                  |                     |                        |                     |                        |                     |                               |                     |                        |                     |                        |                     |
| Maximum likelihood        | 1.155<br>(0.964,1.385)           | 0.118               | 0.797<br>(0.497,1.276) | 0.344               | 0.991<br>(0.793,1.238) | 0.936               | 0.995<br>(0.941,1.052)        | 0.86                | 0.921<br>(0.763,1.111) | 0.39                | 0.946<br>(0.733,1.221) | 0.672               |
| MR-Egger                  | -                                | -                   | 1.098<br>(0.482,2.503) | 0.829               | -                      | -                   | -                             | -                   | 0.933<br>(0.661,1.319) | 0.722               | 1.260<br>(0.780,2.036) | 0.354               |
| Weighted median           | 1.206<br>(0.953,1.526)           | 0.119               | 0.991<br>(0.539,1.824) | 0.977               | -                      | -                   | -                             | -                   | 0.939<br>(0.744,1.184) | 0.592               | 1.088<br>(0.751,1.577) | 0.655               |
| Penalised weighted median | 1.206<br>(0.972,1.496)           | 0.088               | 0.991<br>(0.548,1.794) | 0.977               | -                      | -                   | -                             | -                   | 0.939<br>(0.751,1.174) | 0.579               | 1.112<br>(0.761,1.625) | 0.584               |
| MR-PRESSO                 | -                                | -                   | -                      | -                   | -                      | -                   | -                             | -                   | -                      | -                   | -                      | -                   |
| <b>Stomach cancer</b>     |                                  |                     |                        |                     |                        |                     |                               |                     |                        |                     |                        |                     |
| Maximum likelihood        | 1.071<br>(0.886,1.295)           | 0.48                | 0.57<br>(0.335,0.968)  | 0.037               | 0.92<br>(0.713,1.186)  | 0.518               | 1.034<br>(0.968,1.105)        | 0.324               | 0.858<br>(0.694,1.06)  | 0.156               | 1.003<br>(0.753,1.335) | 0.986               |
| MR-Egger                  | -                                | -                   | 0.763<br>(0.335,1.737) | 0.538               | -                      | -                   | -                             | -                   | 0.866<br>(0.587,1.279) | 0.522               | 1.132<br>(0.67,1.911)  | 0.647               |
| Weighted median           | 1.043<br>(0.830,1.310)           | 0.719               | 0.678<br>(0.347,1.326) | 0.257               | -                      | -                   | -                             | -                   | 0.858<br>(0.665,1.108) | 0.241               | 0.964<br>(0.627,1.482) | 0.866               |
| Penalised weighted median | 1.043<br>(0.830,1.310)           | 0.718               | 0.686<br>(0.344,1.369) | 0.285               | -                      | -                   | -                             | -                   | 0.858<br>(0.664,1.11)  | 0.244               | 0.964<br>(0.62,1.497)  | 0.869               |
| MR-PRESSO                 | -                                | -                   | -                      | -                   | -                      | -                   | -                             | -                   | -                      | -                   | -                      | -                   |
| <b>Colon cancer</b>       |                                  |                     |                        |                     |                        |                     |                               |                     |                        |                     |                        |                     |
| Maximum likelihood        | 0.999<br>(0.914,1.09)            | 0.973               | 0.771<br>(0.605,0.983) | 0.036*              | 0.994<br>(0.888,1.113) | 0.919               | 0.997<br>(0.968,1.026)        | 0.823               | 1.058<br>(0.955,1.172) | 0.28                | 0.925<br>(0.811,1.055) | 0.245               |
| MR-Egger                  | -                                | -                   | 0.811                  | 0.448               | -                      | -                   | -                             | -                   | 0.865                  | 0.27                | 1.225                  | 0.253               |

|                           |                        |       |                        |        |                        |       |                        |       |                        |       |                        |       |
|---------------------------|------------------------|-------|------------------------|--------|------------------------|-------|------------------------|-------|------------------------|-------|------------------------|-------|
|                           |                        |       | (0.486,1.355)          |        |                        |       |                        |       | (0.702,1.068)          |       | (0.872,1.72)           |       |
| Weighted median           | 0.987<br>(0.884,1.103) | 0.822 | 0.699<br>(0.512,0.953) | 0.024* | -                      | -     | -                      | -     | 1.02<br>(0.9,1.155)    | 0.759 | 1.098<br>(0.902,1.338) | 0.351 |
| Penalised weighted median | 0.987<br>(0.888,1.098) | 0.814 | 0.699<br>(0.51,0.958)  | 0.026* | -                      | -     | -                      | -     | 0.998<br>(0.872,1.142) | 0.973 | 1.112<br>(0.919,1.346) | 0.274 |
| MR-PRESSO                 | -                      | -     | -                      | -      | -                      | -     | -                      | -     | -                      | -     | 0.981<br>(0.841,1.144) | 0.808 |
| <b>Pancreatic cancer</b>  |                        |       |                        |        |                        |       |                        |       |                        |       |                        |       |
| Maximum likelihood        | 1.147<br>(0.96,1.371)  | 0.132 | 1.174<br>(0.728,1.895) | 0.51   | 0.869<br>(0.692,1.09)  | 0.224 | 0.97<br>(0.916,1.028)  | 0.306 | 0.885<br>(0.73,1.073)  | 0.213 | 1.122<br>(0.866,1.454) | 0.384 |
| MR-Egger                  | -                      | -     | 1.009<br>(0.429,2.374) | 0.984  | -                      | -     | -                      | -     | 0.703<br>(0.494,1)     | 0.145 | 1.086<br>(0.656,1.797) | 0.75  |
| Weighted median           | 1.24<br>(0.988,1.556)  | 0.063 | 1.095<br>(0.6,1.997)   | 0.768  | -                      | -     | -                      | -     | 0.891<br>(0.691,1.149) | 0.373 | 1.245<br>(0.846,1.831) | 0.267 |
| Penalised weighted median | 1.253<br>(0.979,1.604) | 0.073 | 1.09<br>(0.588,2.02)   | 0.784  | -                      | -     | -                      | -     | 0.891<br>(0.694,1.143) | 0.364 | 1.245<br>(0.852,1.818) | 0.258 |
| MR-PRESSO                 | -                      | -     | -                      | -      | -                      | -     | -                      | -     | -                      | -     | -                      | -     |
| <b>Liver cancer</b>       |                        |       |                        |        |                        |       |                        |       |                        |       |                        |       |
| Maximum likelihood        | 0.974<br>(0.774,1.226) | 0.822 | 1.426<br>(0.76,2.675)  | 0.269  | 0.884<br>(0.661,1.183) | 0.408 | 0.987<br>(0.916,1.064) | 0.738 | 0.895<br>(0.696,1.15)  | 0.385 | 1.19<br>(0.847,1.673)  | 0.316 |
| MR-Egger                  | -                      | -     | 1.241<br>(0.383,4.018) | 0.728  | -                      | -     | -                      | -     | 0.985<br>(0.621,1.564) | 0.954 | 1.547<br>(0.829,2.885) | 0.182 |
| Weighted median           | 1.069<br>(0.798,1.434) | 0.654 | 1.351<br>(0.637,2.863) | 0.433  | -                      | -     | -                      | -     | 0.871<br>(0.641,1.185) | 0.379 | 1.275<br>(0.771,2.109) | 0.344 |
| Penalised weighted median | 1.069<br>(0.793,1.442) | 0.66  | 1.35<br>(0.612,2.979)  | 0.457  | -                      | -     | -                      | -     | 0.871<br>(0.635,1.195) | 0.392 | 1.278<br>(0.777,2.103) | 0.334 |
| MR-PRESSO                 | -                      | -     | -                      | -      | -                      | -     | -                      | -     | -                      | -     | -                      | -     |
| <b>FinnGen</b>            |                        |       |                        |        |                        |       |                        |       |                        |       |                        |       |
| <b>Esophageal cancer</b>  |                        |       |                        |        |                        |       |                        |       |                        |       |                        |       |
| Maximum likelihood        | 1.037<br>(0.721,1.493) | 0.845 | 1.738<br>(0.605,4.99)  | 0.305  | 0.76<br>(0.441,1.311)  | 0.324 | 0.919<br>(0.815,1.036) | 0.166 | 0.992<br>(0.654,1.505) | 0.971 | 0.509<br>(0.297,0.872) | 0.014 |



|                           |                        |       |                         |       |                        |        |                        |       |                        |       |                        |       |
|---------------------------|------------------------|-------|-------------------------|-------|------------------------|--------|------------------------|-------|------------------------|-------|------------------------|-------|
|                           | -                      | -     | 2.161<br>(0.352,13.283) | 0.43  | -                      | -      | -                      | -     | 1.249<br>(0.595,2.622) | 0.599 | 0.215<br>(0.079,0.587) | 0.006 |
| MR-Egger                  |                        |       |                         |       |                        |        |                        |       |                        |       |                        |       |
| Weighted median           | 1.09<br>(0.687,1.728)  | 0.714 | 2.264<br>(0.579,8.854)  | 0.24  | -                      | -      | -                      | -     | 1.087<br>(0.652,1.814) | 0.748 | 0.381<br>(0.18,0.806)  | 0.012 |
| Penalised weighted median | 1.09<br>(0.692,1.717)  | 0.71  | 2.264<br>(0.557,9.211)  | 0.254 | -                      | -      | -                      | -     | 1.087<br>(0.658,1.798) | 0.744 | 0.381<br>(0.178,0.815) | 0.013 |
| MR-PRESSO                 | -                      | -     | -                       | -     | -                      | -      | -                      | -     | -                      | -     | -                      | -     |
| <b>Stomach cancer</b>     |                        |       |                         |       |                        |        |                        |       |                        |       |                        |       |
|                           | 1.224<br>(0.935,1.603) | 0.141 | 1.821<br>(0.937,3.539)  | 0.077 | 0.866<br>(0.653,1.148) | 0.317  | 1.036<br>(0.964,1.113) | 0.339 | 0.856<br>(0.657,1.116) | 0.251 | 1.03<br>(0.743,1.428)  | 0.859 |
| Maximum likelihood        |                        |       | 0.963<br>(0.267,3.477)  | 0.956 | -                      | -      | -                      | -     | 0.975<br>(0.448,2.121) | 0.953 | 0.802<br>(0.436,1.474) | 0.484 |
| MR-Egger                  |                        |       |                         |       |                        |        |                        |       |                        |       |                        |       |
| Weighted median           | 1.209<br>(0.882,1.658) | 0.238 | 1.536<br>(0.626,3.767)  | 0.348 | -                      | -      | -                      | -     | 0.971<br>(0.693,1.362) | 0.866 | 0.9<br>(0.565,1.434)   | 0.658 |
| Penalised weighted median | 1.209<br>(0.873,1.676) | 0.254 | 1.535<br>(0.657,3.586)  | 0.323 | -                      | -      | -                      | -     | 1.008<br>(0.736,1.381) | 0.961 | 0.901<br>(0.576,1.412) | 0.65  |
| MR-PRESSO                 | -                      | -     | -                       | -     | -                      | -      | -                      | -     | -                      | -     | -                      | -     |
| <b>Colon cancer</b>       |                        |       |                         |       |                        |        |                        |       |                        |       |                        |       |
|                           | 0.944<br>(0.827,1.079) | 0.398 | 0.737<br>(0.502,1.082)  | 0.119 | 1.107<br>(0.935,1.311) | 0.239  | 0.958<br>(0.917,1)     | 0.052 | 0.907<br>(0.778,1.058) | 0.213 | 0.841<br>(0.691,1.024) | 0.085 |
| Maximum likelihood        |                        |       | 0.746<br>(0.386,1.44)   | 0.408 | -                      | -      | -                      | -     | 0.887<br>(0.678,1.16)  | 0.445 | 0.787<br>(0.519,1.195) | 0.272 |
| MR-Egger                  |                        |       |                         |       |                        |        |                        |       |                        |       |                        |       |
| Weighted median           | 0.969<br>(0.826,1.136) | 0.698 | 0.668<br>(0.396,1.127)  | 0.130 | -                      | -      | -                      | -     | 0.931<br>(0.777,1.114) | 0.435 | 0.776<br>(0.58,1.039)  | 0.089 |
| Penalised weighted median | 0.969<br>(0.825,1.138) | 0.701 | 0.668<br>(0.396,1.127)  | 0.131 | -                      | -      | -                      | -     | 0.931<br>(0.776,1.116) | 0.439 | 0.776<br>(0.584,1.032) | 0.081 |
| MR-PRESSO                 | -                      | -     | -                       | -     | -                      | -      | -                      | -     | -                      | -     | -                      | -     |
| <b>Pancreatic cancer</b>  |                        |       |                         |       |                        |        |                        |       |                        |       |                        |       |
|                           | 0.942<br>(0.751,1.182) | 0.607 | 0.898<br>(0.466,1.733)  | 0.749 | 0.705<br>(0.525,0.946) | 0.020* | 1.047<br>(0.974,1.127) | 0.215 | 0.801<br>(0.62,1.036)  | 0.09  | 1.267<br>(0.907,1.77)  | 0.166 |
| Maximum likelihood        |                        |       |                         |       |                        |        |                        |       |                        |       |                        |       |

|                           |               |       |               |       |             |       |               |       |               |       |               |       |
|---------------------------|---------------|-------|---------------|-------|-------------|-------|---------------|-------|---------------|-------|---------------|-------|
|                           | -             | -     | 0.754         | 0.638 | -           | -     | -             | -     | 0.668         | 0.184 | 1.668         | 0.121 |
| MR-Egger                  |               |       | (0.243,2.337) |       |             |       |               |       | (0.421,1.059) |       | (0.894,3.113) |       |
|                           | 0.947         | 0.701 | 1.097         | 0.833 | -           | -     | -             | -     | 0.75          | 0.098 | 1.292         | 0.329 |
| Weighted median           | (0.715,1.253) |       | (0.466,2.582) |       |             |       |               |       | (0.533,1.054) |       | (0.772,2.161) |       |
| Penalised weighted median | 0.947         | 0.703 | 1.116         | 0.796 | -           | -     | -             | -     | 0.75          | 0.087 | 1.292         | 0.311 |
|                           | (0.714,1.256) |       | (0.485,2.566) |       |             |       |               |       | (0.539,1.043) |       | (0.787,2.12)  |       |
| MR-PRESSO                 | -             | -     | -             | -     | -           | -     | -             | -     | -             | -     | -             | -     |
| <b>Liver cancer</b>       |               |       |               |       |             |       |               |       |               |       |               |       |
|                           | 1.011         | 0.501 | 0.338         | 0.021 | 0.937       | 0.749 | 1.072         | 0.181 | 0.92          | 0.654 | 1.453         | 0.118 |
| Maximum likelihood        | (0.979,1.044) |       | (0.135,0.849) |       | (0.627,1.4) |       | (0.968,1.188) |       | (0.637,1.327) |       | (0.909,2.322) |       |
|                           |               |       | 0.417         | 0.409 | -           | -     | -             | -     | 1.058         | 0.906 | 1.924         | 0.182 |
| MR-Egger                  |               |       | (0.058,2.977) |       |             |       |               |       | (0.447,2.506) |       | (0.756,4.898) |       |
|                           | 1.012         | 0.566 | 0.23          | 0.02  | -           | -     | -             | -     | 0.972         | 0.899 | 1.081         | 0.834 |
| Weighted median           | (0.972,1.053) |       | (0.066,0.795) |       |             |       |               |       | (0.629,1.503) |       | (0.521,2.246) |       |
| Penalised weighted median | 1.012         | 0.552 | 0.22          | 0.017 | -           | -     | -             | -     | 0.972         | 0.903 | 1.08          | 0.834 |
|                           | (0.973,1.052) |       | (0.063,0.76)  |       |             |       |               |       | (0.619,1.527) |       | (0.528,2.208) |       |
| MR-PRESSO                 | -             | -     | -             | -     | -           | -     | -             | -     | -             | -     | -             | -     |

The MR-Egger, weighted median and penalized weighted median require the number of SNPs in the instrumental variable  $> 2$ , and MR-Egger method cannot accurately estimate due to collinearity in MR analyses for  $\alpha$ -tocopherols. The MR-PRESSO requires the number of SNPs in the instrument variable  $> 3$ . If the MR-PRESSO global test did not identify significant outliers in the genetic instrument, the MR-PRESSO did not require correction.

**Table S6 The complementary MR analyses results of the causal effects of circulating antioxidant metabolites on five digestive system cancers.**

| MR methods                | $\alpha$ -Tocopherol<br>(11 SNPs) |                 | $\gamma$ -Tocopherol<br>(13 SNPs) |                 | Ascorbate<br>(14 SNPs) |                 | Retinol<br>(26 SNPs)   |                 | Urate<br>(18 SNPs)     |                 |
|---------------------------|-----------------------------------|-----------------|-----------------------------------|-----------------|------------------------|-----------------|------------------------|-----------------|------------------------|-----------------|
|                           | OR (95%CI)                        | <i>p</i> -Value | OR (95%CI)                        | <i>p</i> -Value | OR (95%CI)             | <i>p</i> -Value | OR (95%CI)             | <i>p</i> -Value | OR (95%CI)             | <i>p</i> -Value |
| <b>UK Biobank</b>         |                                   |                 |                                   |                 |                        |                 |                        |                 |                        |                 |
| <b>Esophageal cancer</b>  |                                   |                 |                                   |                 |                        |                 |                        |                 |                        |                 |
| Maximum likelihood        | 0.995<br>(0.846,1.17)             | 0.954           | 0.997<br>(0.989,1.005)            | 0.441           | 0.89<br>(0.653,1.212)  | 0.46            | 0.871<br>(0.784,0.968) | 0.01            | 1.181<br>(0.945,1.477) | 0.144           |
| MR-Egger                  | 0.854<br>(0.571,1.279)            | 0.464           | 0.987<br>(0.97,1.004)             | 0.167           | 1.208<br>(0.701,2.082) | 0.51            | 0.865<br>(0.668,1.12)  | 0.28            | 1.405<br>(0.926,2.13)  | 0.129           |
| Weighted median           | 0.995<br>(0.803,1.233)            | 0.966           | 0.999<br>(0.989,1.01)             | 0.875           | 0.967<br>(0.652,1.434) | 0.867           | 0.848<br>(0.733,0.98)  | 0.026           | 1.129<br>(0.836,1.526) | 0.429           |
| Penalised weighted median | 0.995<br>(0.8,1.239)              | 0.967           | 0.999<br>(0.988,1.01)             | 0.881           | 0.968<br>(0.655,1.429) | 0.869           | 0.846<br>(0.738,0.97)  | 0.017           | 1.129<br>(0.843,1.512) | 0.414           |
| MR-PRESSO                 | -                                 | -               | -                                 | -               | -                      | -               | -                      | -               | -                      | -               |
| <b>Stomach cancer</b>     |                                   |                 |                                   |                 |                        |                 |                        |                 |                        |                 |
| Maximum likelihood        | 1.072<br>(0.895,1.285)            | 0.45            | 0.924<br>(0.844,1.012)            | 0.09            | 0.921<br>(0.672,1.261) | 0.606           | 0.937<br>(0.831,1.055) | 0.282           | 1.024<br>(0.795,1.319) | 0.855           |
| MR-Egger                  | 1.259<br>(0.824,1.925)            | 0.314           | 0.879<br>(0.722,1.069)            | 0.222           | 0.901<br>(0.521,1.56)  | 0.716           | 0.857<br>(0.617,1.19)  | 0.366           | 1.194<br>(0.651,2.19)  | 0.574           |
| Weighted median           | 1.058<br>(0.839,1.334)            | 0.636           | 0.925<br>(0.817,1.047)            | 0.216           | 0.886<br>(0.578,1.358) | 0.58            | 1.019<br>(0.868,1.196) | 0.82            | 1.016<br>(0.724,1.425) | 0.927           |
| Penalised weighted median | 1.058<br>(0.834,1.341)            | 0.644           | 0.925<br>(0.812,1.053)            | 0.237           | 0.886<br>(0.581,1.352) | 0.575           | 1.021<br>(0.863,1.207) | 0.812           | 1.018<br>(0.74,1.401)  | 0.913           |
| MR-PRESSO                 | -                                 | -               | -                                 | -               | -                      | -               | -                      | -               | -                      | -               |
| <b>Colon cancer</b>       |                                   |                 |                                   |                 |                        |                 |                        |                 |                        |                 |
| Maximum likelihood        | 1.001                             | 0.972           | 1                                 | 0.92            | 0.928                  | 0.327           | 1.025                  | 0.382           | 0.994                  | 0.276           |

|                           |  |               |       |               |       |               |       |               |       |               |       |
|---------------------------|--|---------------|-------|---------------|-------|---------------|-------|---------------|-------|---------------|-------|
|                           |  | (0.922,1.088) |       | (0.996,1.004) |       | (0.799,1.078) |       | (0.97,1.082)  |       | (0.982,1.005) |       |
| MR-Egger                  |  | 0.947         | 0.596 | 1.004         | 0.427 | 1.03          | 0.822 | 1.038         | 0.638 | 1.003         | 0.816 |
|                           |  | (0.78,1.15)   |       | (0.994,1.014) |       | (0.801,1.324) |       | (0.89,1.211)  |       | (0.981,1.024) |       |
| Weighted median           |  | 0.979         | 0.714 | 1.001         | 0.674 | 0.962         | 0.695 | 1.019         | 0.648 | 0.998         | 0.786 |
|                           |  | (0.875,1.096) |       | (0.996,1.007) |       | (0.791,1.17)  |       | (0.941,1.103) |       | (0.983,1.013) |       |
| Penalised weighted median |  | 0.979         | 0.708 | 1.001         | 0.653 | 0.962         | 0.693 | 1.015         | 0.695 | 0.998         | 0.786 |
|                           |  | (0.877,1.093) |       | (0.996,1.007) |       | (0.791,1.168) |       | (0.942,1.094) |       | (0.983,1.013) |       |
| MR-PRESSO                 |  | -             | -     | -             | -     | -             | -     | -             | -     | -             | -     |
| <hr/>                     |  |               |       |               |       |               |       |               |       |               |       |
| Pancreatic cancer         |  |               |       |               |       |               |       |               |       |               |       |
| Maximum likelihood        |  | 0.9           | 0.209 | 1.014         | 0.744 | 1.412         | 0.025 | 0.923         | 0.142 | 1.034         | 0.775 |
|                           |  | (0.763,1.061) |       | (0.933,1.102) |       | (1.045,1.908) |       | (0.83,1.027)  |       | (0.824,1.296) |       |
| MR-Egger                  |  | 0.605         | 0.031 | 0.901         | 0.445 | 1.535         | 0.117 | 1.003         | 0.983 | 1.013         | 0.952 |
|                           |  | (0.412,0.889) |       | (0.695,1.167) |       | (0.934,2.523) |       | (0.771,1.304) |       | (0.663,1.548) |       |
| Weighted median           |  | 0.865         | 0.224 | 0.985         | 0.805 | 1.438         | 0.061 | 0.935         | 0.387 | 1.036         | 0.812 |
|                           |  | (0.685,1.093) |       | (0.877,1.107) |       | (0.983,2.103) |       | (0.804,1.088) |       | (0.776,1.383) |       |
| Penalised weighted median |  | 0.865         | 0.216 | 0.986         | 0.822 | 1.438         | 0.085 | 0.935         | 0.359 | 1.036         | 0.822 |
|                           |  | (0.688,1.088) |       | (0.875,1.112) |       | (0.951,2.173) |       | (0.811,1.079) |       | (0.763,1.406) |       |
| MR-PRESSO                 |  | -             | -     | 1.039         | 0.473 | -             | -     | -             | -     | -             | -     |
|                           |  |               |       | (0.937,1.152) |       |               |       |               |       |               |       |
| <hr/>                     |  |               |       |               |       |               |       |               |       |               |       |
| Liver cancer              |  |               |       |               |       |               |       |               |       |               |       |
| Maximum likelihood        |  | 0.842         | 0.115 | 1.011         | 0.842 | 0.984         | 0.934 | 1.033         | 0.658 | 1.097         | 0.547 |
|                           |  | (0.68,1.043)  |       | (0.908,1.125) |       | (0.676,1.432) |       | (0.896,1.191) |       | (0.812,1.481) |       |
| MR-Egger                  |  | 0.638         | 0.114 | 0.95          | 0.674 | 0.976         | 0.946 | 0.775         | 0.213 | 1.155         | 0.673 |
|                           |  | (0.385,1.056) |       | (0.752,1.199) |       | (0.495,1.928) |       | (0.524,1.146) |       | (0.598,2.23)  |       |
| Weighted median           |  | 0.79          | 0.089 | 1.023         | 0.772 | 0.92          | 0.758 | 1.118         | 0.282 | 1.133         | 0.526 |
|                           |  | (0.602,1.037) |       | (0.878,1.191) |       | (0.542,1.561) |       | (0.912,1.37)  |       | (0.769,1.67)  |       |
| Penalised weighted median |  | 0.79          | 0.09  | 1.023         | 0.765 | 0.92          | 0.743 | 1.118         | 0.264 | 1.133         | 0.517 |
|                           |  | (0.602,1.037) |       | (0.882,1.185) |       | (0.559,1.514) |       | (0.919,1.359) |       | (0.776,1.656) |       |
| MR-PRESSO                 |  | -             | -     | -             | -     | -             | -     | -             | -     | -             | -     |
| <hr/>                     |  |               |       |               |       |               |       |               |       |               |       |
| FinnGen                   |  |               |       |               |       |               |       |               |       |               |       |
| Esophageal cancer         |  |               |       |               |       |               |       |               |       |               |       |

|                    |          |                        |       |                        |       |                        |       |                        |       |                        |       |
|--------------------|----------|------------------------|-------|------------------------|-------|------------------------|-------|------------------------|-------|------------------------|-------|
| Maximum likelihood |          | 1.186<br>(0.865,1.628) | 0.289 | 1.097<br>(0.94,1.28)   | 0.24  | 0.863<br>(0.459,1.622) | 0.646 | 0.987<br>(0.795,1.226) | 0.909 | 0.874<br>(0.544,1.405) | 0.579 |
| MR-Egger           |          | 2.439<br>(1.089,5.461) | 0.058 | 1.416<br>(1.024,1.958) | 0.059 | 0.824<br>(0.192,3.534) | 0.799 | 1.14<br>(0.679,1.914)  | 0.623 | 0.73<br>(0.282,1.892)  | 0.527 |
| Weighted median    |          | 1.019<br>(0.65,1.598)  | 0.933 | 1.142<br>(0.927,1.407) | 0.211 | 1.095<br>(0.48,2.494)  | 0.83  | 1.095<br>(0.812,1.476) | 0.551 | 0.824<br>(0.438,1.551) | 0.548 |
| Penalised          | weighted | 1.019<br>(0.654,1.59)  | 0.932 | 1.142<br>(0.926,1.409) | 0.215 | 1.099<br>(0.199,6.066) | 0.914 | 1.095<br>(0.806,1.488) | 0.562 | 0.824<br>(0.438,1.55)  | 0.548 |
| MR-PRESSO          |          | -                      | -     | -                      | -     | -                      | -     | -                      | -     | -                      | -     |
| Stomach cancer     |          |                        |       |                        |       |                        |       |                        |       |                        |       |
| Maximum likelihood |          | 1.04<br>(0.86,1.259)   | 0.684 | 0.961<br>(0.873,1.057) | 0.411 | 0.768<br>(0.525,1.122) | 0.173 | 1.142<br>(1.003,1.302) | 0.046 | 1.205<br>(0.906,1.603) | 0.2   |
| MR-Egger           |          | 1.009<br>(0.619,1.646) | 0.971 | 1.111<br>(0.912,1.355) | 0.319 | 0.658<br>(0.345,1.254) | 0.227 | 1.015<br>(0.742,1.388) | 0.928 | 1.236<br>(0.713,2.145) | 0.462 |
| Weighted median    |          | 1.02<br>(0.788,1.319)  | 0.882 | 0.976<br>(0.859,1.109) | 0.709 | 0.768<br>(0.454,1.297) | 0.323 | 1.154<br>(0.968,1.376) | 0.11  | 1.225<br>(0.853,1.761) | 0.272 |
| Penalised          | weighted | 1.02<br>(0.791,1.314)  | 0.88  | 0.976<br>(0.855,1.114) | 0.718 | 0.768<br>(0.419,1.405) | 0.391 | 1.154<br>(0.966,1.379) | 0.115 | 1.225<br>(0.832,1.803) | 0.303 |
| MR-PRESSO          |          | -                      | -     | -                      | -     | -                      | -     | -                      | -     | -                      | -     |
| Colon cancer       |          |                        |       |                        |       |                        |       |                        |       |                        |       |
| Maximum likelihood |          | 1.081<br>(0.961,1.215) | 0.194 | 1.017<br>(0.96,1.077)  | 0.573 | 0.927<br>(0.735,1.169) | 0.522 | 0.991<br>(0.915,1.072) | 0.819 | 1.028<br>(0.864,1.222) | 0.756 |
| MR-Egger           |          | 1.112<br>(0.777,1.592) | 0.574 | 1.044<br>(0.927,1.176) | 0.493 | 1.02<br>(0.668,1.556)  | 0.929 | 1.078<br>(0.867,1.342) | 0.504 | 1.448<br>(1.038,2.022) | 0.045 |
| Weighted median    |          | 1.025<br>(0.87,1.207)  | 0.771 | 0.984<br>(0.91,1.065)  | 0.692 | 1.022<br>(0.752,1.388) | 0.89  | 1.031<br>(0.924,1.15)  | 0.587 | 1.123<br>(0.895,1.409) | 0.317 |
| Penalised          | weighted | 1.025<br>(0.864,1.214) | 0.779 | 0.984<br>(0.91,1.063)  | 0.677 | 1.024<br>(0.761,1.379) | 0.874 | 1.032<br>(0.924,1.153) | 0.576 | 1.123<br>(0.889,1.418) | 0.331 |
| MR-PRESSO          |          | -                      | -     | -                      | -     | -                      | -     | -                      | -     | -                      | -     |
| Pancreatic cancer  |          |                        |       |                        |       |                        |       |                        |       |                        |       |
| Maximum likelihood |          | 1.114                  | 0.289 | 1.01                   | 0.844 | 0.876                  | 0.498 | 1.022                  | 0.749 | 1.117                  | 0.461 |

|                           |  |               |       |               |       |               |       |               |       |               |       |
|---------------------------|--|---------------|-------|---------------|-------|---------------|-------|---------------|-------|---------------|-------|
|                           |  | (0.912,1.36)  |       | (0.917,1.112) |       | (0.596,1.286) |       | (0.894,1.169) |       | (0.833,1.497) |       |
| MR-Egger                  |  | 1.407         | 0.33  | 1.102         | 0.363 | 0.764         | 0.442 | 0.917         | 0.6   | 1.686         | 0.089 |
|                           |  | (0.735,2.691) |       | (0.901,1.348) |       | (0.393,1.484) |       | (0.665,1.265) |       | (0.957,2.969) |       |
| Weighted median           |  | 1.167         | 0.27  | 1.019         | 0.767 | 0.779         | 0.36  | 0.999         | 0.992 | 1.343         | 0.151 |
|                           |  | (0.887,1.535) |       | (0.901,1.151) |       | (0.456,1.33)  |       | (0.834,1.197) |       | (0.898,2.01)  |       |
| Penalised weighted median |  | 1.167         | 0.282 | 1.019         | 0.773 | 0.779         | 0.359 | 0.999         | 0.992 | 1.343         | 0.133 |
|                           |  | (0.881,1.545) |       | (0.898,1.155) |       | (0.457,1.328) |       | (0.831,1.202) |       | (0.914,1.975) |       |
| MR-PRESSO                 |  | -             | -     | -             | -     | -             | -     | -             | -     | -             | -     |
| <hr/>                     |  |               |       |               |       |               |       |               |       |               |       |
| Liver cancer              |  |               |       |               |       |               |       |               |       |               |       |
| Maximum likelihood        |  | 0.992         | 0.956 | 1.036         | 0.612 | 0.666         | 0.139 | 0.898         | 0.267 | 1.251         | 0.287 |
|                           |  | (0.755,1.305) |       | (0.904,1.187) |       | (0.388,1.141) |       | (0.743,1.086) |       | (0.828,1.891) |       |
| MR-Egger                  |  | 0.668         | 0.297 | 1.068         | 0.655 | 0.566         | 0.252 | 1.323         | 0.232 | 0.616         | 0.306 |
|                           |  | (0.327,1.364) |       | (0.805,1.417) |       | (0.224,1.43)  |       | (0.844,2.074) |       | (0.25,1.515)  |       |
| Weighted median           |  | 0.905         | 0.595 | 0.954         | 0.636 | 0.608         | 0.207 | 1.089         | 0.527 | 0.837         | 0.527 |
|                           |  | (0.627,1.308) |       | (0.784,1.16)  |       | (0.281,1.317) |       | (0.836,1.419) |       | (0.483,1.452) |       |
| Penalised weighted median |  | 0.905         | 0.599 | 0.953         | 0.622 | 0.608         | 0.179 | 1.089         | 0.526 | 0.827         | 0.52  |
|                           |  | (0.624,1.312) |       | (0.786,1.154) |       | (0.294,1.257) |       | (0.836,1.419) |       | (0.464,1.474) |       |
| MR-PRESSO                 |  | -             | -     | -             | -     | -             | -     | -             | -     | -             | -     |

The MR-Egger, weighted median and penalized weighted median require the number of SNPs in the instrumental variable > 2. The MR-PRESSO requires the number of SNPs in the instrument variable > 3. If the MR-PRESSO global test did not identify significant outliers in the genetic instrument, the MR-PRESSO did not require correction.

**Table S7** For the outcomes from other GWAS studies, the sensitivity MR analyses results of the causal effects of absolute ascorbate and retinol level on colon and pancreatic cancer.

| Exposure  | Outcome                                                        | MR methods                       | No. SNPs | Odds ratio (95%CI)    | <i>p</i> -Value |
|-----------|----------------------------------------------------------------|----------------------------------|----------|-----------------------|-----------------|
| Ascorbate | Colon cancer<br>(UKBB consortium, self-reported: colon cancer) | <b>Main MR analysis</b>          |          |                       |                 |
|           |                                                                | Fixed-effect IVW                 | 10       | 0.9993(0.9987,0.9999) | 0.036           |
|           |                                                                | <b>Complementary MR analysis</b> |          |                       |                 |
|           |                                                                | Maximum likelihood               | 10       | 0.9993(0.9987,0.9999) | 0.039           |
|           |                                                                | MR-Egger                         | 10       | 1.0000(0.9992,1.0009) | 0.966           |
|           |                                                                | Weighted median                  | 10       | 0.9996(0.9989,1.0003) | 0.271           |
|           |                                                                | Penalised weighted median        | 10       | 0.9996(0.9989,1.0003) | 0.270           |
| Retinol   | Pancreatic cancer<br>(PanScan1 consortium)                     | MR-PRESSO                        | 10       | -                     | -               |
|           |                                                                | <b>Main MR analysis</b>          |          |                       |                 |
|           |                                                                | Fixed-effect IVW                 | 2        | 0.9630(0.7672,1.2088) | 0.745           |
|           |                                                                | <b>Complementary MR analysis</b> |          |                       |                 |
|           |                                                                | Maximum likelihood               | 2        | 0.9621(0.7642,1.2112) | 0.742           |
|           |                                                                | MR-Egger                         | 2        | -                     | -               |
|           |                                                                | Weighted median                  | 2        | -                     | -               |
|           |                                                                | Penalised weighted median        | 2        | -                     | -               |
|           |                                                                | MR-PRESSO                        | 2        | -                     | -               |
